# Supplementary material for: The single-cell atlas of short-chain fatty acid receptors in human and mice hearts
Source: Front Immunol. 2025 Apr 16;16:1538384. doi: 10.3389/fimmu.2025.1538384 (PMC12040890; doi:10.3389/fimmu.2025.1538384)
Supplement: Supplementary file 5 [file Table4.xlsx]

## Sheet: sma_ffar_deg_cm
Supplemental Table 4
Differential expressed genes of FFAR2+, FFAR3+, FFAR2+/FFAR3+, and FFAR2-/FFAR3- cells in human myocardial infarction heart.
p_val	avg_log2FC	pct.1	pct.2	p_val_adj	cluster	gene
0.004853	0.906059	0.786	0.692	1	ctrl	PLD1
0.005136	0.597261	0.767	0.462	1	ctrl	SENP6
0.006114	0.821088	0.718	0.462	1	ctrl	MPDZ
0.006656	0.891432	0.877	0.615	1	ctrl	CHRM2
0.007761	0.712391	0.723	0.385	1	ctrl	ATP2C1
0.008032	0.888121	0.666	0.308	1	ctrl	CMSS1
0.008136	0.714703	0.953	0.923	1	ctrl	THSD4
0.008162	0.913792	0.802	0.692	1	ctrl	SGCG
0.008885	0.762554	0.868	0.769	1	ctrl	ACYP2
0.00946	0.768314	0.536	0.231	1	ctrl	CHCHD10
0.00951	0.652488	0.914	0.846	1	ctrl	USP34
0	1.25069	1	0	0	ffar2	FFAR2
4.01e-08	0.552292	0.462	0.075	0.000843	ffar2	TUT1
8.89e-08	0.419734	0.385	0.053	0.001868	ffar2	SEPTIN4
1.46e-07	0.491597	0.615	0.131	0.003069	ffar2	COMMD6
1.85e-07	0.28621	0.462	0.074	0.003888	ffar2	KLF10
2.24e-07	0.309394	0.308	0.037	0.00471	ffar2	CREB3
2.45e-07	0.275942	0.462	0.075	0.005141	ffar2	B3GAT3
1.32e-06	0.407927	0.308	0.042	0.027636	ffar2	CLCF1
1.94e-06	0.262089	0.308	0.042	0.040805	ffar2	DNM1
3.84e-06	0.798097	0.462	0.097	0.080719	ffar2	SPRY1
6.22e-06	0.431521	0.385	0.069	0.130607	ffar2	LINC02360
6.68e-06	0.436093	0.308	0.048	0.140313	ffar2	STX19
8.48e-06	0.880508	0.769	0.283	0.178158	ffar2	PLAA
3.26e-05	0.337142	0.462	0.107	0.685642	ffar2	ANGPTL2
3.66e-05	0.554965	0.462	0.104	0.768234	ffar2	ELF3
5.95e-05	0.4039	0.462	0.114	1	ffar2	GCAT
8.21e-05	0.461595	0.308	0.057	1	ffar2	TGFB2
8.63e-05	0.276175	0.385	0.083	1	ffar2	ZYX
8.66e-05	0.303371	0.308	0.057	1	ffar2	RASL12
0.00012	0.48741	0.615	0.195	1	ffar2	AHR
0.000122	0.357292	0.308	0.059	1	ffar2	KBTBD8
0.000124	0.30428	0.385	0.087	1	ffar2	HNRNPH2
0.000125	0.468994	0.385	0.088	1	ffar2	RAB4B
0.000134	0.862816	0.615	0.227	1	ffar2	RUVBL1
0.000187	0.540249	0.692	0.263	1	ffar2	DNAJA4
0.000201	0.327481	0.615	0.193	1	ffar2	ERO1A
0.000216	0.405427	0.462	0.129	1	ffar2	NUCB1-AS1
0.000221	0.36042	0.385	0.091	1	ffar2	MON1B
0.000249	0.684487	0.308	0.064	1	ffar2	ETV5
0.000296	0.559342	0.308	0.062	1	ffar2	CD163
0.000345	0.690367	0.385	0.097	1	ffar2	TUBA1B
0.000368	0.334205	0.308	0.067	1	ffar2	ZNF699
0.000375	0.700504	0.462	0.136	1	ffar2	NUBP1
0.000377	0.387101	0.692	0.259	1	ffar2	MET
0.000392	0.274731	0.538	0.165	1	ffar2	STK10
0.000423	1.22626	0.923	0.604	1	ffar2	RRAD
0.000435	0.403128	0.538	0.175	1	ffar2	PARP8
0.000533	0.391014	0.615	0.218	1	ffar2	LPIN2
0.000575	0.27405	0.308	0.069	1	ffar2	G2E3-AS1
0.000618	0.35654	0.462	0.135	1	ffar2	CYP51A1
0.000628	1.05372	0.308	0.071	1	ffar2	HEXIM1
0.000715	1.54013	0.615	0.239	1	ffar2	LOC100506869
0.000721	0.70164	0.385	0.106	1	ffar2	PGLS
0.000739	0.589868	0.538	0.194	1	ffar2	IRX5
0.000889	0.439486	0.615	0.239	1	ffar2	NARS1
0.000937	0.282156	0.385	0.105	1	ffar2	NDUFAF1
0.000965	0.322093	0.462	0.144	1	ffar2	VASP
0.000975	0.335075	0.385	0.108	1	ffar2	ZGRF1
0.001016	0.702803	0.692	0.311	1	ffar2	ENO1
0.001053	0.357735	0.462	0.149	1	ffar2	NONO
0.001096	0.290211	0.462	0.148	1	ffar2	MIER3
0.001119	0.657207	0.462	0.15	1	ffar2	PIP5K1C
0.001184	0.579964	1	0.774	1	ffar2	ANKS1A
0.00119	0.902506	0.538	0.205	1	ffar2	PABIR3
0.001286	0.536425	0.923	0.472	1	ffar2	FRMD5
0.001289	0.543812	1	0.709	1	ffar2	ENAH
0.001366	0.447176	0.846	0.417	1	ffar2	OTULIN
0.001457	1.10282	0.538	0.206	1	ffar2	SPTLC3
0.001548	1.14984	0.846	0.41	1	ffar2	ADAMTS9
0.001587	0.756789	0.692	0.354	1	ffar2	GAS7
0.001815	0.638079	0.308	0.079	1	ffar2	TGIF1
0.001901	0.302374	0.308	0.081	1	ffar2	PPP4C
0.00192	0.58566	0.846	0.498	1	ffar2	CHD1
0.002229	0.256302	0.308	0.079	1	ffar2	UBXN8
0.002265	0.419264	0.538	0.206	1	ffar2	FBXO7
0.002403	1.38519	0.769	0.428	1	ffar2	PNPLA8
0.002518	0.416013	0.615	0.296	1	ffar2	EMC2
0.002551	0.535669	0.846	0.475	1	ffar2	RAPGEF1
0.00262	0.296285	0.308	0.084	1	ffar2	B3GNTL1
0.002696	0.411727	0.462	0.167	1	ffar2	MSH4
0.002757	0.340406	0.538	0.211	1	ffar2	AKTIP
0.002787	0.333138	0.462	0.163	1	ffar2	MMADHC
0.00288	0.685289	0.308	0.086	1	ffar2	EMC8
0.002995	0.63452	0.615	0.273	1	ffar2	CAVIN4
0.003033	0.281257	0.308	0.085	1	ffar2	NKAPL
0.003359	0.593123	0.769	0.376	1	ffar2	MIRLET7BHG
0.003449	0.689421	0.308	0.089	1	ffar2	CLN6
0.003598	0.796743	0.462	0.177	1	ffar2	PEX2
0.003698	0.348205	0.385	0.121	1	ffar2	KLHL32
0.003722	0.585144	1	0.739	1	ffar2	MEIS1
0.003723	0.400766	0.462	0.177	1	ffar2	MCFD2
0.003803	0.347272	0.692	0.342	1	ffar2	NUP50-DT
0.003861	0.804979	0.769	0.448	1	ffar2	MCU
0.004539	0.933103	0.923	0.618	1	ffar2	TTTY14
0.004561	0.594468	0.769	0.403	1	ffar2	BNIP3L
0.004667	0.957448	0.923	0.696	1	ffar2	PTPRE
0.004934	0.3356	0.308	0.094	1	ffar2	DDX59
0.005271	0.272302	0.385	0.131	1	ffar2	SRRT
0.005395	0.32784	0.462	0.175	1	ffar2	NTPCR
0.005489	0.486832	0.769	0.454	1	ffar2	FMNL2
0.005744	0.33638	0.385	0.139	1	ffar2	ACP1
0.005927	0.678594	0.462	0.195	1	ffar2	IPO5
0.006052	0.620661	0.769	0.519	1	ffar2	LPGAT1
0.006071	0.352598	0.692	0.324	1	ffar2	NAA50
0.006398	0.639551	0.692	0.378	1	ffar2	TMOD3
0.006422	0.286422	0.385	0.136	1	ffar2	C15orf40
0.0065	0.636503	1	0.771	1	ffar2	NFIC
0.006756	0.609242	0.692	0.373	1	ffar2	RPL10
0.006953	0.290838	0.462	0.172	1	ffar2	CBX7
0.007086	0.688361	0.308	0.1	1	ffar2	C3orf62
0.007145	0.965298	0.923	0.653	1	ffar2	SLC2A13
0.007213	0.849729	0.769	0.404	1	ffar2	RNF122
0.007595	0.661802	0.462	0.199	1	ffar2	GANAB
0.008218	0.632318	0.615	0.319	1	ffar2	LINC00662
0.00824	0.292506	0.308	0.098	1	ffar2	GIMAP8
0.008257	0.322177	0.308	0.094	1	ffar2	ZNF496
0.008327	0.276698	0.462	0.188	1	ffar2	EIF2S1
0.008496	0.717214	0.462	0.194	1	ffar2	ANGPTL4
0.008537	0.502973	0.923	0.603	1	ffar2	FABP3
0.008759	0.275262	0.462	0.188	1	ffar2	PDSS1
0.008909	0.332615	0.538	0.242	1	ffar2	SPMIP2
0.009227	0.250055	0.308	0.097	1	ffar2	PSMD6-AS2
0.009229	0.269906	0.385	0.141	1	ffar2	SIKE1
0.009365	0.453585	0.769	0.441	1	ffar2	CD58
0.009498	0.378025	0.692	0.384	1	ffar2	SLC16A10
0.009608	0.58669	0.692	0.363	1	ffar2	RBM12B
0.009859	0.667251	0.308	0.101	1	ffar2	TNFSF13B
0.009905	0.256555	0.308	0.097	1	ffar2	SAP18
0.009931	0.610125	0.385	0.152	1	ffar2	WBP11

## Sheet: sma_ffar_deg_ec
p_val	avg_log2FC	pct.1	pct.2	p_val_adj	cluster	gene
0	2.41006	1	0	0	ffar2	FFAR2
0	0.672557	0.25	0	0	ffar2	LINC02444
8.62e-79	0.914737	0.25	0.001	1.81e-74	ffar2	C1orf127
6.08e-59	1.45102	0.25	0.001	1.28e-54	ffar2	IRF4
1.21e-52	1.53878	0.5	0.004	2.54e-48	ffar2	H2BC4
1.77e-49	0.663983	0.25	0.001	3.71e-45	ffar2	CD70
6.68e-43	1.89563	0.5	0.005	1.4e-38	ffar2	PRC1-AS1
1.07e-37	0.663907	0.25	0.001	2.25e-33	ffar2	HLA-DQA1
1.1e-37	0.661958	0.25	0.001	2.32e-33	ffar2	NAA11
2.8e-36	0.663487	0.25	0.002	5.88e-32	ffar2	PGM5-AS1
2.16e-34	1.04537	0.25	0.002	4.54e-30	ffar2	WDR86-AS1
2.65e-34	0.662174	0.25	0.002	5.56e-30	ffar2	ZBTB20-AS4
1.19e-32	1.43843	0.25	0.002	2.51e-28	ffar2	APOC1
8.7e-29	1.86002	0.5	0.008	1.83e-24	ffar2	RUBCNL
2.44e-28	1.03757	0.25	0.002	5.13e-24	ffar2	AQP7B
1.64e-26	1.43854	0.25	0.002	3.46e-22	ffar2	LOC112268269
1.01e-25	0.90281	0.25	0.002	2.12e-21	ffar2	TLR6
3.42e-25	1.63922	0.25	0.002	7.18e-21	ffar2	LOC101927026
3.93e-25	1.43337	0.25	0.002	8.27e-21	ffar2	SPOCD1
3.82e-24	0.656588	0.25	0.002	8.03e-20	ffar2	LLPH-DT
5.68e-24	1.33637	0.5	0.009	1.19e-19	ffar2	PKIA-AS1
1.39e-22	1.44931	0.25	0.003	2.92e-18	ffar2	FUT9
1.28e-21	1.431	0.25	0.003	2.69e-17	ffar2	LAX1
7.62e-20	1.47333	0.5	0.011	1.6e-15	ffar2	USP35
1.96e-19	0.892427	0.25	0.003	4.12e-15	ffar2	ARHGAP11A
3.11e-19	0.645487	0.25	0.003	6.54e-15	ffar2	LINC01405
1.38e-18	0.896143	0.25	0.003	2.91e-14	ffar2	PRRT1
4.97e-18	1.43264	0.25	0.003	1.04e-13	ffar2	CD28
7.07e-18	1.63065	0.25	0.003	1.49e-13	ffar2	FAM83B
2.37e-17	1.03094	0.25	0.003	4.98e-13	ffar2	PCDHGB3
2.55e-17	1.02694	0.25	0.003	5.35e-13	ffar2	DACT3-AS1
1.15e-16	1.41936	0.25	0.004	2.43e-12	ffar2	PCLAF
8.87e-16	1.59791	0.75	0.032	1.86e-11	ffar2	PGLS
1.85e-15	0.635142	0.25	0.004	3.89e-11	ffar2	GPR35
4.76e-15	1.01017	0.25	0.004	1e-10	ffar2	SPC24
4.88e-15	1.42336	0.25	0.004	1.03e-10	ffar2	H1-3
6.34e-15	0.869877	0.25	0.004	1.33e-10	ffar2	SHISA9
8.13e-15	0.882486	0.25	0.004	1.71e-10	ffar2	LPAR5
1.34e-14	0.643992	0.25	0.004	2.82e-10	ffar2	GPR63
1.49e-14	1.42897	0.25	0.004	3.13e-10	ffar2	FSBP
2.91e-14	1.02082	0.25	0.004	6.11e-10	ffar2	ZNF581
1.78e-13	0.640661	0.25	0.004	3.74e-09	ffar2	CUZD1
3.22e-13	1.02273	0.25	0.005	6.77e-09	ffar2	ZNF619
3.44e-13	1.41649	0.25	0.005	7.22e-09	ffar2	BLNK
3.87e-13	0.632325	0.25	0.005	8.12e-09	ffar2	UCP2
3.95e-13	1.42308	0.25	0.005	8.3e-09	ffar2	TMEM25
1.4e-12	1.0171	0.25	0.005	2.95e-08	ffar2	S1PR2
1.61e-12	1.02006	0.25	0.005	3.39e-08	ffar2	SPIN4
4.21e-12	0.862119	0.25	0.005	8.85e-08	ffar2	MACC1
4.37e-12	0.88537	0.25	0.005	9.19e-08	ffar2	KCNN4
1.08e-11	1.01254	0.25	0.005	2.26e-07	ffar2	DIO1
1.09e-11	1.55557	0.5	0.02	2.28e-07	ffar2	IL34
1.25e-11	0.882122	0.25	0.005	2.63e-07	ffar2	SEMA7A
1.53e-11	1.43879	0.25	0.005	3.22e-07	ffar2	PPM1M
1.75e-11	1.09073	0.25	0.005	3.68e-07	ffar2	SAMD13
2.84e-11	1.40734	0.25	0.005	5.96e-07	ffar2	MAPK13
4.4e-11	1.39001	0.25	0.006	9.24e-07	ffar2	FAM83D
8.07e-11	1.0099	0.25	0.006	1.7e-06	ffar2	TYRP1
1.06e-10	1.74271	0.75	0.048	2.23e-06	ffar2	RRN3
1.64e-10	1.41061	0.25	0.006	3.45e-06	ffar2	PLGLB1
2.05e-10	0.616165	0.25	0.006	4.31e-06	ffar2	MUC1
2.4e-10	1.01087	0.25	0.006	5.04e-06	ffar2	TMEM186
2.76e-10	0.861263	0.25	0.006	5.81e-06	ffar2	LY86
3.19e-10	1.39356	0.25	0.006	6.7e-06	ffar2	LOC107984948
3.37e-10	1.13175	0.5	0.023	7.07e-06	ffar2	AAAS
3.56e-10	1.73474	0.5	0.024	7.47e-06	ffar2	CLSTN2
8.25e-10	1.00723	0.25	0.006	1.73e-05	ffar2	EXO5
9.21e-10	0.611104	0.25	0.006	1.93e-05	ffar2	ZMAT4
9.75e-10	0.620716	0.25	0.006	2.05e-05	ffar2	LOC112694756
9.92e-10	1.54074	0.5	0.025	2.08e-05	ffar2	ADCK1
1.41e-09	1.40346	0.25	0.007	2.96e-05	ffar2	TBL3
2.15e-09	1.4038	0.25	0.007	4.52e-05	ffar2	ALDOA
2.29e-09	1.39288	0.25	0.007	4.81e-05	ffar2	CRACD
2.67e-09	0.624338	0.25	0.007	5.62e-05	ffar2	LINC01909
2.77e-09	1.76305	0.75	0.056	5.83e-05	ffar2	EFEMP1
3.26e-09	1.39695	0.25	0.007	6.85e-05	ffar2	PLEK
5.38e-09	0.867872	0.25	0.007	0.000113	ffar2	LOC105372432
1.02e-08	1.7869	0.75	0.061	0.000213	ffar2	KMT2B
1.12e-08	0.610624	0.25	0.007	0.000235	ffar2	CD37
1.21e-08	0.611364	0.25	0.007	0.000254	ffar2	RPP25L
1.26e-08	0.618357	0.25	0.007	0.000266	ffar2	CARD16
1.29e-08	2.15897	0.5	0.028	0.000272	ffar2	MICAL1
1.36e-08	0.843974	0.25	0.007	0.000286	ffar2	ADAMTS14
1.49e-08	1.10206	0.5	0.028	0.000313	ffar2	POMT1
1.49e-08	0.857767	0.25	0.007	0.000314	ffar2	CCND2-AS1
1.68e-08	1.70619	0.5	0.029	0.000353	ffar2	POLR3GL
1.82e-08	1.82528	0.75	0.064	0.000383	ffar2	NSMCE4A
1.83e-08	0.859827	0.25	0.007	0.000385	ffar2	YIPF7
2.12e-08	1.71063	0.5	0.029	0.000444	ffar2	TRIM14
2.24e-08	0.619043	0.25	0.007	0.00047	ffar2	TRIM32
2.27e-08	0.612448	0.25	0.007	0.000476	ffar2	ZNF530
2.64e-08	1.07122	0.25	0.008	0.000555	ffar2	APCDD1L
4.94e-08	0.590035	0.25	0.008	0.001038	ffar2	GRIN2A
5.5e-08	1.39689	0.75	0.064	0.001156	ffar2	TFEB
5.85e-08	0.847762	0.25	0.008	0.001229	ffar2	KHDRBS2
6.88e-08	0.612961	0.25	0.008	0.001447	ffar2	FIGNL1
6.96e-08	0.608545	0.25	0.008	0.001463	ffar2	WFDC1
7.41e-08	2.16702	0.75	0.069	0.001557	ffar2	COL21A1
9.13e-08	1.48751	0.5	0.031	0.001919	ffar2	RAB13
1.16e-07	1.73763	0.5	0.032	0.002441	ffar2	POLE
1.35e-07	0.611443	0.25	0.008	0.002831	ffar2	LOC105369911
1.47e-07	1.33302	0.5	0.032	0.003096	ffar2	TTC8
1.52e-07	1.50466	0.5	0.032	0.003192	ffar2	PDCL
1.54e-07	0.866767	0.25	0.008	0.003238	ffar2	ZNF792
2.16e-07	0.612134	0.25	0.009	0.004545	ffar2	ZNF232
2.3e-07	0.977167	0.25	0.009	0.004842	ffar2	CCDC192
2.43e-07	0.608213	0.25	0.009	0.005107	ffar2	KBTBD4
2.48e-07	0.604538	0.25	0.009	0.005216	ffar2	LINC01843
2.66e-07	0.98002	0.25	0.009	0.005592	ffar2	VASN
2.92e-07	0.987208	0.25	0.009	0.006134	ffar2	PCDHGA9
3.02e-07	0.847976	0.25	0.009	0.006335	ffar2	RCCD1
3.18e-07	1.62716	0.5	0.035	0.00669	ffar2	ERMARD
3.37e-07	0.990504	0.25	0.009	0.007082	ffar2	PRRT3-AS1
3.57e-07	1.30185	0.5	0.034	0.007491	ffar2	TMEM14C
3.76e-07	1.59321	0.5	0.035	0.007911	ffar2	NLN
4.09e-07	0.600162	0.25	0.009	0.008589	ffar2	PRRG3
5.19e-07	0.996824	0.25	0.009	0.010902	ffar2	LINC02848
5.33e-07	1.37362	0.25	0.009	0.011198	ffar2	LOX
5.53e-07	1.04583	0.5	0.034	0.011611	ffar2	SDE2
5.57e-07	1.35328	0.25	0.009	0.011708	ffar2	BRIP1
5.7e-07	1.0385	0.5	0.034	0.011967	ffar2	UNC45A
5.85e-07	1.49319	0.5	0.035	0.012295	ffar2	PLD2
6.51e-07	1.60938	0.75	0.076	0.013688	ffar2	PSMB1
6.69e-07	1.56525	0.75	0.076	0.014048	ffar2	NSF
6.85e-07	1.95575	0.75	0.081	0.014404	ffar2	RBM28
7.15e-07	0.58668	0.25	0.009	0.015028	ffar2	ATP6V1C2
7.56e-07	1.624	0.5	0.036	0.015893	ffar2	RHOQ-AS1
7.57e-07	0.601238	0.25	0.009	0.015904	ffar2	DIAPH1-AS1
8.92e-07	1.3746	0.25	0.01	0.018736	ffar2	FZD3
9.09e-07	0.597594	0.25	0.01	0.019101	ffar2	SPATA18
9.89e-07	0.844306	0.25	0.01	0.020774	ffar2	LINC00339
1.01e-06	1.39076	0.25	0.01	0.021243	ffar2	LINC03022
1.02e-06	1.13864	0.5	0.036	0.021398	ffar2	ANKRD16
1.05e-06	2.08197	0.25	0.01	0.022001	ffar2	INCENP
1.06e-06	1.37167	0.25	0.01	0.022226	ffar2	SNHG4
1.09e-06	1.58435	0.5	0.037	0.022961	ffar2	KDM6B
1.24e-06	0.59503	0.25	0.01	0.026102	ffar2	CLCA4-AS1
1.46e-06	0.836264	0.25	0.01	0.030717	ffar2	EMSY-DT
1.53e-06	1.43277	0.5	0.038	0.032214	ffar2	GALNS
1.55e-06	1.3694	0.25	0.01	0.032622	ffar2	SEMA5B
1.56e-06	1.31203	0.75	0.077	0.032857	ffar2	EPM2AIP1
1.62e-06	1.46484	0.5	0.038	0.034051	ffar2	CEP126
2.01e-06	0.837485	0.25	0.01	0.042139	ffar2	NHERF1
2.02e-06	0.809502	0.25	0.01	0.042541	ffar2	ADGRE2
2.06e-06	1.03293	0.5	0.038	0.043289	ffar2	ZDHHC9
2.28e-06	1.37558	0.25	0.01	0.048013	ffar2	ANAPC2
2.44e-06	0.57869	0.25	0.01	0.051323	ffar2	XG
2.51e-06	1.82018	0.5	0.04	0.052745	ffar2	DOCK2
2.54e-06	0.977588	0.25	0.01	0.05337	ffar2	TTC23-AS1
2.7e-06	1.75695	0.75	0.086	0.056836	ffar2	UBASH3B
2.78e-06	2.00363	0.75	0.086	0.058476	ffar2	LRP1
3.09e-06	1.12026	0.5	0.039	0.064999	ffar2	MAP1LC3A
3.34e-06	1.73604	0.5	0.041	0.070167	ffar2	ZNF354B
3.58e-06	0.971934	0.25	0.011	0.075275	ffar2	TMEM106C
3.8e-06	0.999865	0.5	0.039	0.0798	ffar2	CBX1
3.88e-06	1.6191	0.75	0.087	0.08144	ffar2	SLC30A5
3.9e-06	1.43164	0.5	0.041	0.081872	ffar2	OAF
4.39e-06	0.841366	0.25	0.011	0.09235	ffar2	SGSH
4.67e-06	1.52388	0.5	0.041	0.098226	ffar2	PLEKHO1
4.8e-06	1.37368	0.25	0.011	0.100819	ffar2	ADPRH
4.83e-06	1.37182	0.25	0.011	0.101522	ffar2	GNB1L
5.2e-06	1.02302	0.25	0.011	0.109266	ffar2	PPP1R42
5.21e-06	0.966292	0.25	0.011	0.10954	ffar2	U2AF1L4
5.36e-06	1.83117	0.5	0.044	0.112669	ffar2	KLHL6
5.87e-06	1.62824	0.75	0.092	0.123304	ffar2	BLCAP
6.02e-06	0.970223	0.25	0.011	0.126508	ffar2	IGSF3
6.09e-06	0.592995	0.25	0.011	0.127874	ffar2	EDA2R
6.89e-06	0.965545	0.25	0.011	0.144862	ffar2	TSPOAP1-AS1
7.38e-06	1.61319	0.5	0.044	0.155074	ffar2	SCO1
7.56e-06	1.31405	0.25	0.011	0.15877	ffar2	STAB2
7.6e-06	0.962138	0.25	0.011	0.159599	ffar2	PLEKHF1
7.91e-06	1.54973	0.75	0.091	0.166145	ffar2	ZNF346
8.31e-06	0.589093	0.25	0.011	0.174656	ffar2	NSMCE3
8.48e-06	1.21859	0.5	0.043	0.178088	ffar2	TTF2
8.77e-06	0.837702	0.25	0.012	0.184185	ffar2	ZFPL1
8.97e-06	0.590058	0.25	0.011	0.188483	ffar2	TMEM150A
9.09e-06	0.836702	0.25	0.012	0.191068	ffar2	GHDC
9.16e-06	1.44302	1	0.151	0.192441	ffar2	UBE2E3
9.27e-06	0.965447	0.25	0.012	0.194754	ffar2	GON7
9.48e-06	1.80536	1	0.167	0.199187	ffar2	IQCK
9.72e-06	0.580155	0.25	0.012	0.204317	ffar2	APCDD1L-DT
9.88e-06	0.581796	0.25	0.012	0.207515	ffar2	B4GALT2
1.02e-05	0.841532	0.25	0.012	0.214907	ffar2	ADAMTSL4-AS2
1.08e-05	1.35269	0.25	0.012	0.227782	ffar2	PFAS
1.14e-05	0.953627	0.25	0.012	0.239579	ffar2	GNAO1
1.19e-05	1.09392	0.5	0.043	0.24949	ffar2	STX4
1.24e-05	0.577422	0.25	0.012	0.261604	ffar2	ZNF771
1.27e-05	1.50042	0.5	0.045	0.265946	ffar2	EYA1
1.32e-05	1.03108	0.25	0.012	0.276836	ffar2	KLHL25
1.34e-05	1.44628	0.75	0.094	0.28165	ffar2	RARS1
1.35e-05	0.961489	0.25	0.012	0.28365	ffar2	LOC102724023
1.37e-05	0.583197	0.25	0.012	0.28839	ffar2	PRKX-AS1
1.43e-05	1.97738	0.75	0.105	0.301307	ffar2	TSHZ3
1.63e-05	1.09999	0.5	0.045	0.342623	ffar2	TXNDC9
1.71e-05	0.800043	0.25	0.012	0.359233	ffar2	VAV1
2e-05	0.944308	0.25	0.012	0.420456	ffar2	ZNF730
2.07e-05	0.829219	0.25	0.012	0.435654	ffar2	OPA1-AS1
2.1e-05	0.967999	0.25	0.013	0.440373	ffar2	PCDHGA12
2.12e-05	0.959202	0.25	0.013	0.4463	ffar2	GPKOW
2.21e-05	0.979662	0.5	0.045	0.463423	ffar2	EDC3
2.26e-05	0.572271	0.25	0.012	0.474931	ffar2	DNAH6
2.34e-05	0.58458	0.25	0.013	0.490978	ffar2	CREB3
2.47e-05	0.962796	0.25	0.013	0.519355	ffar2	SEPHS2
2.65e-05	1.34788	0.25	0.013	0.556319	ffar2	LMNB2
2.69e-05	0.98077	0.5	0.046	0.566019	ffar2	WTIP
2.75e-05	1.512	0.75	0.101	0.576883	ffar2	MPP3
2.75e-05	1.31884	0.25	0.013	0.578579	ffar2	SSUH2
2.8e-05	0.948426	0.25	0.013	0.589232	ffar2	APOL4
2.85e-05	0.953992	0.25	0.013	0.599581	ffar2	TMEM178A
2.89e-05	0.824975	0.25	0.013	0.607821	ffar2	PREB
3.1e-05	1.49579	0.75	0.102	0.652419	ffar2	ARHGAP6
3.13e-05	1.3786	0.25	0.013	0.657319	ffar2	NPIPB15
3.32e-05	2.00239	0.75	0.111	0.697484	ffar2	ABCA1
3.42e-05	0.541678	0.25	0.013	0.718527	ffar2	RAB7B
3.49e-05	0.579585	0.25	0.013	0.733636	ffar2	PIGA
3.57e-05	0.563441	0.25	0.013	0.749337	ffar2	SYCP3
3.59e-05	1.18772	0.5	0.048	0.75472	ffar2	LOC101928882
3.65e-05	0.57397	0.25	0.013	0.767565	ffar2	ZNF773
3.99e-05	1.22308	0.5	0.049	0.838638	ffar2	IFT25
4.25e-05	1.61726	0.75	0.11	0.893438	ffar2	SIN3A
4.37e-05	1.04909	0.5	0.049	0.919292	ffar2	GTF2H2
4.41e-05	1.05891	0.5	0.049	0.926151	ffar2	TMEM68
4.54e-05	1.34643	0.25	0.014	0.953104	ffar2	DBR1
4.57e-05	0.580567	0.25	0.013	0.960826	ffar2	ADRB2
4.58e-05	1.34241	0.25	0.014	0.962825	ffar2	IL18
4.61e-05	1.02533	0.25	0.014	0.969728	ffar2	PLAAT4
4.63e-05	1.33798	0.25	0.014	0.972641	ffar2	VAMP8
4.98e-05	1.56255	0.25	0.014	1	ffar2	C1orf115
5.14e-05	1.07337	0.5	0.049	1	ffar2	RHOU
5.33e-05	0.558313	0.25	0.013	1	ffar2	MYOT
5.49e-05	0.57424	0.25	0.014	1	ffar2	FXYD2
5.52e-05	0.546474	0.25	0.014	1	ffar2	CFAP251
5.64e-05	0.973058	0.5	0.049	1	ffar2	TMEM184C
5.65e-05	0.754672	0.25	0.014	1	ffar2	SDS
6.5e-05	1.59985	0.5	0.054	1	ffar2	ZNF577
6.65e-05	0.800577	0.25	0.014	1	ffar2	HAUS8
6.78e-05	1.40868	0.75	0.109	1	ffar2	IARS1
6.94e-05	0.574835	0.25	0.014	1	ffar2	CCDC71L
7.06e-05	1.34915	0.25	0.014	1	ffar2	THAP9
7.45e-05	1.36219	0.75	0.109	1	ffar2	NPIPB5
7.78e-05	0.809986	0.25	0.014	1	ffar2	TSPYL4
8.11e-05	0.946839	0.25	0.014	1	ffar2	WAKMAR2
8.3e-05	0.565386	0.25	0.014	1	ffar2	HTRA2
8.58e-05	1.3324	0.25	0.015	1	ffar2	MRPL55
9.01e-05	0.764497	0.25	0.014	1	ffar2	ZNF93
9.28e-05	1.1547	0.5	0.052	1	ffar2	MGST1
9.6e-05	1.2644	1	0.178	1	ffar2	ANKRD28
9.65e-05	1.29087	0.5	0.053	1	ffar2	LOXHD1
0.000103	0.552137	0.25	0.014	1	ffar2	CAVIN4
0.000106	1.11509	0.75	0.108	1	ffar2	ERI3
0.000107	0.546164	0.25	0.015	1	ffar2	VWCE
0.00011	1.51474	1	0.187	1	ffar2	AFAP1
0.000127	0.572763	0.25	0.015	1	ffar2	ZNF649
0.000132	1.41088	0.75	0.118	1	ffar2	CHD4
0.000133	1.0033	0.5	0.054	1	ffar2	WDR19
0.000139	1.31456	0.75	0.114	1	ffar2	ANTXR2
0.00014	1.3246	0.75	0.115	1	ffar2	IFT43
0.000143	0.797698	0.25	0.015	1	ffar2	POLR3H
0.000144	1.09356	0.5	0.054	1	ffar2	DPP7
0.000146	0.800814	0.25	0.015	1	ffar2	DZANK1
0.000152	1.84491	0.5	0.061	1	ffar2	RNF122
0.000154	0.555279	0.25	0.015	1	ffar2	KLHL15
0.000161	0.537723	0.25	0.015	1	ffar2	FRMPD4
0.000162	1.33504	0.25	0.016	1	ffar2	ABRACL
0.000165	0.799656	0.25	0.015	1	ffar2	RPL22L1
0.000172	0.917436	0.5	0.055	1	ffar2	SLC12A4
0.000175	0.8861	0.5	0.055	1	ffar2	KCTD1
0.000176	1.27872	0.5	0.057	1	ffar2	TAGLN
0.000183	0.55553	0.25	0.016	1	ffar2	ARRDC4
0.000184	1.24268	1	0.19	1	ffar2	RFX7
0.000187	0.797816	0.25	0.016	1	ffar2	ANKRD54
0.000189	0.921873	0.25	0.016	1	ffar2	MS4A7
0.000193	0.79918	0.25	0.016	1	ffar2	CACNB3
0.000193	1.32326	0.25	0.016	1	ffar2	SEPTIN4-AS1
0.000201	1.40913	0.5	0.059	1	ffar2	UBTF
0.000201	1.68307	1	0.233	1	ffar2	ARPC2
0.000201	1.14229	0.5	0.057	1	ffar2	TOMM20
0.000214	0.927659	0.25	0.016	1	ffar2	NKRF
0.000217	0.892637	0.5	0.056	1	ffar2	GBP4
0.000219	1.31144	0.5	0.059	1	ffar2	EFL1
0.000223	0.553403	0.25	0.016	1	ffar2	TMEM126A
0.000238	0.919178	0.25	0.016	1	ffar2	LINC02552
0.000238	1.7715	0.75	0.128	1	ffar2	MCM3AP
0.000239	1.41085	0.75	0.126	1	ffar2	LMTK2
0.000242	1.2752	0.5	0.06	1	ffar2	METTL9
0.000249	1.49981	0.5	0.062	1	ffar2	ZNF266
0.00025	1.69249	0.75	0.141	1	ffar2	PPP1R21
0.000251	1.00945	0.5	0.058	1	ffar2	STING1
0.00026	0.54803	0.25	0.016	1	ffar2	POLR1F
0.000261	0.541212	0.25	0.016	1	ffar2	PERP
0.000262	0.549576	0.25	0.016	1	ffar2	GALNT8
0.000267	1.43035	0.5	0.062	1	ffar2	LONRF1
0.000269	1.27122	0.25	0.017	1	ffar2	PIK3CD
0.000274	1.36772	0.5	0.06	1	ffar2	SERPINE2
0.000278	0.791831	0.25	0.017	1	ffar2	MOV10L1
0.000282	0.982323	0.5	0.058	1	ffar2	MBOAT2
0.000286	1.26139	1	0.205	1	ffar2	BAZ1A
0.000292	0.755682	0.25	0.016	1	ffar2	KIFC2
0.000298	1.2514	0.5	0.06	1	ffar2	AFF3
0.00031	1.49599	0.5	0.064	1	ffar2	AGGF1
0.000311	1.23943	0.75	0.125	1	ffar2	NDST1
0.000331	1.42369	0.75	0.133	1	ffar2	SETD3
0.000347	1.31725	0.25	0.017	1	ffar2	PHF5A
0.000347	0.783863	0.25	0.017	1	ffar2	VARS1
0.00035	1.51746	0.25	0.018	1	ffar2	RBM38
0.000352	1.40835	0.5	0.064	1	ffar2	LOC100129434
0.000355	1.85964	0.75	0.143	1	ffar2	TBL1X
0.000356	0.866029	0.5	0.059	1	ffar2	ADA
0.000368	0.539455	0.25	0.017	1	ffar2	STON1-GTF2A1L
0.000372	0.924795	0.25	0.017	1	ffar2	STX11
0.000377	1.26395	0.75	0.128	1	ffar2	PLEC
0.000393	0.52136	0.25	0.017	1	ffar2	C1QB
0.000395	1.35503	0.5	0.064	1	ffar2	ANKRD13D
0.000398	1.1227	0.5	0.062	1	ffar2	ZNF276
0.000409	0.549957	0.25	0.017	1	ffar2	MMAA
0.000412	0.912656	0.25	0.017	1	ffar2	SLC25A11
0.000417	1.61515	0.75	0.131	1	ffar2	EOLA2-DT
0.000424	1.58671	0.5	0.065	1	ffar2	GCH1
0.000436	1.30758	0.25	0.018	1	ffar2	RFNG
0.000437	0.898659	0.25	0.018	1	ffar2	VAT1L
0.00045	1.32548	0.25	0.018	1	ffar2	ZNF223
0.000452	0.985904	0.25	0.018	1	ffar2	TP53I13
0.000454	0.779992	0.25	0.018	1	ffar2	PDLIM2
0.000458	1.46618	0.5	0.067	1	ffar2	METTL2B
0.00046	1.37674	0.5	0.065	1	ffar2	EEIG2
0.000465	1.08083	0.75	0.125	1	ffar2	TNNT3
0.000465	0.784409	0.25	0.018	1	ffar2	NOP2
0.000465	1.468	0.5	0.067	1	ffar2	VPS35
0.00047	1.48342	0.5	0.068	1	ffar2	UBA5
0.000471	0.897141	0.25	0.018	1	ffar2	HEYL
0.000478	0.892034	0.5	0.061	1	ffar2	SLC25A53
0.000496	1.65779	1	0.276	1	ffar2	USP25
0.000499	0.94184	0.5	0.062	1	ffar2	RAP2C-AS1
0.000509	1.2511	0.25	0.018	1	ffar2	ITGAX
0.000516	1.26442	0.5	0.065	1	ffar2	TUBB4B
0.00053	1.6188	0.5	0.069	1	ffar2	DIRC3
0.00053	0.924252	0.25	0.018	1	ffar2	TMEM35B
0.000534	0.898204	0.25	0.018	1	ffar2	AMDHD2
0.000535	1.06769	0.5	0.064	1	ffar2	MLYCD
0.000553	1.30614	0.5	0.066	1	ffar2	TRIB2
0.000559	1.255	0.5	0.066	1	ffar2	DIMT1
0.000588	0.919287	0.25	0.018	1	ffar2	CHCHD7
0.000591	1.08145	0.5	0.065	1	ffar2	ZC3H3
0.000596	0.911186	0.25	0.018	1	ffar2	CYSLTR1
0.000598	0.536315	0.25	0.018	1	ffar2	BUD31
0.000619	1.28518	0.25	0.019	1	ffar2	P3H4
0.000628	0.847336	0.5	0.063	1	ffar2	VAMP5
0.000641	1.49918	1	0.302	1	ffar2	ANKH
0.000651	1.30217	0.25	0.019	1	ffar2	MIEF1
0.000653	1.3837	0.5	0.069	1	ffar2	COPS2
0.000658	0.872749	0.25	0.018	1	ffar2	AKR1C8
0.000658	1.292	0.25	0.019	1	ffar2	CCHCR1
0.000672	0.87879	0.5	0.064	1	ffar2	FARSB
0.000675	1.71899	0.75	0.151	1	ffar2	CTSB
0.000683	0.990415	0.75	0.128	1	ffar2	KLF13
0.000683	0.771028	0.25	0.019	1	ffar2	ADCY1
0.000688	0.756067	0.25	0.019	1	ffar2	KLC2
0.000693	0.917534	0.25	0.019	1	ffar2	CDAN1
0.000711	0.526466	0.25	0.018	1	ffar2	ATP8
0.000712	0.904466	0.25	0.019	1	ffar2	RPP14
0.000717	0.778187	0.25	0.019	1	ffar2	ZNF852
0.000733	0.534063	0.25	0.019	1	ffar2	MUTYH
0.000747	0.779028	0.25	0.019	1	ffar2	ANKDD1B
0.000749	1.29662	0.5	0.068	1	ffar2	TFRC
0.000757	0.535953	0.25	0.019	1	ffar2	IL20RB
0.000758	1.13688	0.5	0.068	1	ffar2	RBCK1
0.000758	0.538834	0.25	0.019	1	ffar2	ZNF555
0.000769	0.844135	0.5	0.065	1	ffar2	PSMG2
0.00077	1.44526	0.5	0.071	1	ffar2	RILPL2
0.000784	1.39543	0.5	0.071	1	ffar2	SNX8
0.000797	1.14952	0.75	0.134	1	ffar2	RPS16
0.000799	1.30557	0.25	0.02	1	ffar2	HECTD3
0.000842	0.706436	0.25	0.019	1	ffar2	C16orf74
0.000848	1.5533	0.75	0.158	1	ffar2	MACROH2A1
0.000852	0.781278	0.25	0.019	1	ffar2	ZNF778
0.000857	0.923654	0.5	0.066	1	ffar2	MMS22L
0.000861	1.2531	0.5	0.07	1	ffar2	ANKMY1
0.000949	0.753134	0.25	0.019	1	ffar2	COL13A1
0.000953	0.509298	0.25	0.019	1	ffar2	TGFB3
0.000959	0.890416	0.25	0.02	1	ffar2	TNFRSF12A
0.00096	1.2946	0.75	0.146	1	ffar2	NR2C1
0.000974	0.524556	0.25	0.019	1	ffar2	UBE2D4
0.00098	1.00084	0.75	0.134	1	ffar2	AGPS
0.000991	1.1622	0.75	0.142	1	ffar2	G3BP1
0.001001	1.30527	0.25	0.02	1	ffar2	RPS6KL1
0.001031	0.894351	0.25	0.02	1	ffar2	NUDT22
0.001058	1.38181	0.5	0.074	1	ffar2	CWC22
0.001066	0.521153	0.25	0.02	1	ffar2	SUMO3
0.001077	0.533797	0.25	0.02	1	ffar2	SAAL1
0.00109	1.27744	0.75	0.149	1	ffar2	LIPE-AS1
0.001114	0.898498	0.25	0.02	1	ffar2	SPDYE21
0.001114	1.61933	0.75	0.151	1	ffar2	MGAT1
0.001117	1.24348	0.5	0.072	1	ffar2	ZNF529
0.001169	0.515452	0.25	0.02	1	ffar2	FANCI
0.001171	2.07772	1	0.335	1	ffar2	FMNL2
0.001178	0.790367	0.5	0.068	1	ffar2	SEMA6C
0.001212	1.21336	0.75	0.147	1	ffar2	PCGF3-AS1
0.001224	1.22461	0.5	0.073	1	ffar2	BCLAF3
0.001231	1.3039	0.25	0.021	1	ffar2	SLFNL1-AS1
0.001255	0.879055	0.25	0.02	1	ffar2	MED16
0.001258	1.06758	0.5	0.071	1	ffar2	LTA4H
0.001271	0.517721	0.25	0.02	1	ffar2	CHMP3-AS1
0.001303	0.807874	0.5	0.069	1	ffar2	NF2
0.001307	0.767462	0.5	0.069	1	ffar2	ADAMTS9-AS1
0.001307	1.24412	0.5	0.074	1	ffar2	MTMR6
0.001347	0.825944	0.5	0.07	1	ffar2	EIF4ENIF1
0.001348	0.520683	0.25	0.02	1	ffar2	PIP4P1
0.001371	0.518683	0.25	0.02	1	ffar2	LAMTOR2
0.001378	0.909852	0.25	0.021	1	ffar2	LZTFL1
0.001416	0.523059	0.25	0.02	1	ffar2	MED31
0.001431	0.899904	0.25	0.021	1	ffar2	AGPAT2
0.001438	1.0709	0.5	0.073	1	ffar2	DENND4B
0.00145	0.898405	0.25	0.021	1	ffar2	VPS11
0.001467	0.503164	0.25	0.02	1	ffar2	MCTP2
0.001476	1.2872	0.25	0.022	1	ffar2	OGN
0.001482	0.507208	0.25	0.021	1	ffar2	C17orf75
0.001483	0.757493	0.25	0.021	1	ffar2	CYB561
0.001496	0.886346	0.25	0.021	1	ffar2	TOR3A
0.001517	0.951907	0.25	0.021	1	ffar2	WNT5B
0.001571	0.514038	0.25	0.021	1	ffar2	EPN2-AS1
0.001587	0.80665	0.5	0.071	1	ffar2	ATF6B
0.001608	0.904576	0.25	0.021	1	ffar2	ZNF281
0.001614	0.933164	0.5	0.073	1	ffar2	GXYLT1
0.001616	0.511988	0.25	0.021	1	ffar2	DDX19A-DT
0.001635	1.38396	0.5	0.079	1	ffar2	CCNT1
0.001637	1.32113	0.5	0.078	1	ffar2	SOAT1
0.001659	0.891916	0.25	0.021	1	ffar2	PPP3CB-AS1
0.001674	0.91315	0.5	0.073	1	ffar2	MFSD8
0.001721	0.875699	0.25	0.021	1	ffar2	CXADR
0.001722	0.756305	0.25	0.021	1	ffar2	CRTC2
0.001734	1.24937	0.25	0.022	1	ffar2	SLC7A8
0.00174	0.897314	0.25	0.022	1	ffar2	LINC01535
0.001748	0.898137	0.5	0.073	1	ffar2	CAMSAP1
0.001753	1.2739	0.25	0.022	1	ffar2	CAD
0.001761	1.18437	0.5	0.076	1	ffar2	AKAP8
0.00177	0.747335	0.25	0.021	1	ffar2	COQ10A
0.00178	1.78868	0.5	0.079	1	ffar2	CTSL
0.001785	1.24157	1	0.283	1	ffar2	MTDH
0.001793	1.37326	0.75	0.172	1	ffar2	PRR14L
0.001794	1.38322	0.5	0.081	1	ffar2	IL13RA1
0.001825	0.504598	0.25	0.021	1	ffar2	PTPRR
0.001833	1.639	1	0.289	1	ffar2	DYSF
0.001855	1.16582	0.5	0.077	1	ffar2	MRPL20
0.001874	0.482299	0.25	0.021	1	ffar2	UNC45B
0.001888	0.887116	0.25	0.022	1	ffar2	GFUS
0.001912	1.52143	1	0.375	1	ffar2	DISC1
0.001921	0.519609	0.25	0.021	1	ffar2	CEP41
0.001923	0.512081	0.25	0.021	1	ffar2	ETV5
0.001934	0.997047	1	0.236	1	ffar2	MAPK1
0.001938	0.85819	0.25	0.022	1	ffar2	DNAAF4
0.001993	1.08502	0.5	0.076	1	ffar2	SLC27A1
0.002014	0.690331	0.25	0.022	1	ffar2	PPT2
0.002046	0.734187	0.25	0.022	1	ffar2	GAS2L3
0.002046	0.749046	0.25	0.022	1	ffar2	SH2D4A
0.002164	0.498607	0.25	0.022	1	ffar2	HFM1
0.00217	0.498181	0.25	0.022	1	ffar2	FEZ1
0.002172	0.754065	0.25	0.022	1	ffar2	MCRS1
0.0022	1.8662	0.5	0.084	1	ffar2	DPY19L1
0.002218	0.89595	0.75	0.146	1	ffar2	GALNT2
0.002219	0.756859	0.25	0.022	1	ffar2	NKAPD1
0.002221	1.21756	1	0.29	1	ffar2	ZMYM4
0.002241	0.786234	0.5	0.074	1	ffar2	LIPA
0.002261	0.758261	0.25	0.022	1	ffar2	NIPSNAP3B
0.002279	0.506952	0.25	0.022	1	ffar2	BBS5
0.002304	1.25357	0.5	0.08	1	ffar2	NR6A1
0.00232	0.734443	0.25	0.022	1	ffar2	SLC41A2
0.002448	1.25838	0.25	0.023	1	ffar2	PPT1
0.002498	1.39077	0.75	0.184	1	ffar2	YTHDC2
0.002517	0.782874	0.5	0.076	1	ffar2	CPNE2
0.002522	1.40589	1	0.347	1	ffar2	TEAD1
0.002526	1.03598	0.5	0.079	1	ffar2	PHF11
0.002575	1.02381	0.5	0.08	1	ffar2	DDHD2
0.002578	1.13994	0.75	0.162	1	ffar2	RNF217
0.002606	0.50338	0.25	0.023	1	ffar2	AAR2
0.002649	0.768327	0.25	0.023	1	ffar2	FAM66C
0.002662	0.511541	0.25	0.023	1	ffar2	MARCKSL1
0.002691	1.11088	1	0.273	1	ffar2	LARP4B
0.002702	0.511103	0.25	0.023	1	ffar2	THAP5
0.002728	1.02882	0.5	0.079	1	ffar2	INKA2
0.002729	0.511799	0.25	0.023	1	ffar2	GPR161
0.002747	1.24916	0.25	0.024	1	ffar2	ASB2
0.002853	1.14074	0.75	0.165	1	ffar2	TEAD4
0.002874	0.680025	0.5	0.076	1	ffar2	TSPAN5
0.002876	0.700333	0.5	0.077	1	ffar2	GOLGA2
0.002892	0.776009	0.5	0.077	1	ffar2	WDR73
0.002942	0.496089	0.25	0.023	1	ffar2	TEX264
0.002946	0.990688	0.5	0.08	1	ffar2	WIPI1
0.002975	0.475271	0.25	0.023	1	ffar2	ECM1
0.003047	0.487245	0.25	0.023	1	ffar2	INTS15
0.003062	1.27381	0.5	0.085	1	ffar2	ERAP2
0.003146	0.87072	0.75	0.154	1	ffar2	DYNC1LI2
0.003151	1.30127	0.5	0.086	1	ffar2	ZSCAN5A
0.00316	0.853327	0.5	0.08	1	ffar2	TARDBP
0.003163	1.27632	0.25	0.025	1	ffar2	ZNF317
0.003184	0.984302	0.5	0.081	1	ffar2	TRMT9B
0.003211	0.50309	0.25	0.023	1	ffar2	B4GALT4
0.00325	0.705852	0.25	0.024	1	ffar2	QRICH2
0.003255	1.19132	0.5	0.085	1	ffar2	AKAP11
0.003289	0.490075	0.25	0.023	1	ffar2	FGD1
0.003366	0.48932	0.25	0.023	1	ffar2	CASP6
0.003378	1.06591	0.75	0.165	1	ffar2	VPS37B
0.003437	1.95543	0.25	0.025	1	ffar2	KCNIP2
0.003461	0.745427	0.25	0.024	1	ffar2	FTSJ1
0.003463	0.492068	0.25	0.023	1	ffar2	HTATIP2
0.003531	0.990811	0.5	0.083	1	ffar2	ATF4
0.003548	1.15528	0.5	0.085	1	ffar2	CEP162
0.003582	1.16429	0.5	0.085	1	ffar2	AGK
0.003614	1.24957	0.5	0.087	1	ffar2	EFTUD2
0.003623	1.34248	0.5	0.09	1	ffar2	TMX3
0.003662	0.49727	0.25	0.024	1	ffar2	HAUS3
0.00371	0.978832	0.5	0.083	1	ffar2	TTL
0.003721	1.64015	0.5	0.088	1	ffar2	TNFRSF19
0.003725	0.733457	0.25	0.024	1	ffar2	NAPRT
0.003733	0.4723	0.25	0.024	1	ffar2	TRUB2
0.003739	0.470939	0.25	0.024	1	ffar2	NLRC3
0.003762	1.05787	0.75	0.166	1	ffar2	DNM1L
0.003764	0.933224	1	0.267	1	ffar2	SEPTIN9
0.003794	0.476617	0.25	0.024	1	ffar2	C19orf53
0.003854	0.710989	0.25	0.024	1	ffar2	WDR46
0.003875	0.775618	0.5	0.081	1	ffar2	ENDOD1
0.003878	0.877795	0.25	0.025	1	ffar2	TRIM3
0.003882	0.905009	1	0.255	1	ffar2	RNF216
0.003887	0.478475	0.25	0.024	1	ffar2	PHB1
0.003917	1.25717	0.25	0.026	1	ffar2	LINC00649
0.003935	0.502693	0.25	0.024	1	ffar2	ZNF134
0.003935	1.01626	0.5	0.085	1	ffar2	PNKP
0.00405	1.27042	0.25	0.026	1	ffar2	ZNF268
0.004054	1.00548	0.75	0.166	1	ffar2	ANKFY1
0.004071	1.26244	0.25	0.026	1	ffar2	NEU3
0.004077	0.872266	0.25	0.025	1	ffar2	ZNF580
0.004084	1.39177	0.5	0.09	1	ffar2	GAB3
0.004097	1.27699	0.25	0.026	1	ffar2	BVES
0.004106	0.743057	0.25	0.025	1	ffar2	ZFP62
0.004122	0.843271	0.25	0.025	1	ffar2	STRIP2
0.004124	1.04431	1	0.29	1	ffar2	EEPD1
0.004131	0.479526	0.25	0.024	1	ffar2	MRPL18
0.00414	1.55687	0.75	0.188	1	ffar2	HTT
0.004157	1.824	0.5	0.095	1	ffar2	FKBP15
0.004185	0.71584	0.25	0.025	1	ffar2	INHBB
0.0042	0.854771	0.25	0.025	1	ffar2	LOC101928417
0.004234	0.858535	0.25	0.025	1	ffar2	BAG1
0.004239	1.17476	0.75	0.178	1	ffar2	CD63
0.004265	0.469798	0.25	0.024	1	ffar2	DMTN
0.004278	1.33226	0.5	0.093	1	ffar2	TDG
0.004295	1.2646	0.25	0.026	1	ffar2	TMEM106A
0.00431	1.56271	0.75	0.195	1	ffar2	HYCC1
0.004322	0.853115	0.25	0.025	1	ffar2	UXT
0.004368	1.67839	0.5	0.092	1	ffar2	HRAT17
0.00437	1.20166	0.5	0.088	1	ffar2	SEMA3C
0.004377	1.1476	0.75	0.18	1	ffar2	TMBIM4
0.004391	1.17612	0.25	0.026	1	ffar2	P2RX4
0.004398	0.704026	0.25	0.025	1	ffar2	FRAS1
0.004422	0.963963	0.75	0.166	1	ffar2	TRAF3IP2-AS1
0.004455	1.20896	0.75	0.189	1	ffar2	COL1A2
0.00447	1.45584	0.25	0.026	1	ffar2	CEP20
0.004489	0.470756	0.25	0.025	1	ffar2	RECQL5
0.004502	0.669138	0.25	0.025	1	ffar2	ADAMTS2
0.004544	1.22972	0.25	0.026	1	ffar2	HAVCR2
0.004592	1.2485	0.25	0.026	1	ffar2	SLC25A30
0.004625	1.49893	0.5	0.095	1	ffar2	SZT2
0.004673	1.30942	0.5	0.093	1	ffar2	SEMA6B
0.004682	1.31965	0.5	0.094	1	ffar2	GTF2E2
0.00471	0.814929	0.5	0.084	1	ffar2	CDRT4
0.004713	1.21643	0.5	0.091	1	ffar2	OSBPL2
0.00472	1.25931	0.25	0.026	1	ffar2	MINPP1
0.004723	1.21451	0.5	0.09	1	ffar2	CCDC146
0.004736	0.484605	0.25	0.025	1	ffar2	COPS7A
0.004741	0.877084	0.25	0.026	1	ffar2	KLHL9
0.004791	0.485881	0.25	0.025	1	ffar2	MRPL47
0.00482	0.819733	0.75	0.162	1	ffar2	ZC3H7A
0.004821	0.479449	0.25	0.025	1	ffar2	FIRRM
0.004916	1.18598	0.75	0.187	1	ffar2	DDX60L
0.004944	0.696941	0.5	0.083	1	ffar2	TOB2
0.005015	0.720528	0.25	0.026	1	ffar2	GAS8
0.005099	0.968878	0.75	0.171	1	ffar2	NUBPL
0.005136	0.479985	0.25	0.025	1	ffar2	CFAP69
0.005167	0.483322	0.25	0.025	1	ffar2	BTN2A2
0.005182	0.477775	0.25	0.025	1	ffar2	TAF10
0.005228	0.849428	0.5	0.086	1	ffar2	ENY2
0.005238	0.488106	0.25	0.025	1	ffar2	RAB32
0.005273	1.26831	0.25	0.027	1	ffar2	MPZL2
0.005314	0.741898	0.5	0.085	1	ffar2	FKTN
0.005359	1.26329	0.25	0.027	1	ffar2	TLE3
0.005488	1.23166	0.5	0.094	1	ffar2	SMC1A
0.005525	1.06033	0.5	0.091	1	ffar2	PSMD11
0.005554	0.794793	0.5	0.087	1	ffar2	GTF3C2
0.00561	0.858074	0.25	0.027	1	ffar2	ALG11
0.005613	0.836354	0.25	0.026	1	ffar2	RAB40B
0.005636	1.21555	0.5	0.094	1	ffar2	IL10RB
0.005664	0.951515	0.5	0.089	1	ffar2	GMPS
0.005694	0.928087	0.25	0.027	1	ffar2	LOC100506321
0.005704	0.723848	0.25	0.026	1	ffar2	IFT27
0.005753	0.424082	0.25	0.026	1	ffar2	SLC43A2
0.005868	1.2681	0.75	0.208	1	ffar2	PTBP3
0.005878	0.471815	0.25	0.026	1	ffar2	TRIM69
0.005893	1.24083	0.25	0.028	1	ffar2	HMGB2
0.005914	1.2132	0.25	0.027	1	ffar2	FZR1
0.005925	1.27408	0.25	0.028	1	ffar2	ERV3-1
0.006022	1.00152	0.5	0.091	1	ffar2	ZNF559
0.006044	1.33224	0.75	0.184	1	ffar2	ULK4
0.006047	1.47491	0.75	0.214	1	ffar2	ACTR3
0.006089	0.470569	0.25	0.026	1	ffar2	DFFB
0.006123	0.470541	0.25	0.026	1	ffar2	BLVRA
0.006144	0.728442	0.25	0.027	1	ffar2	ZNF746
0.006159	0.701799	0.25	0.027	1	ffar2	N4BP3
0.006159	0.909345	0.75	0.173	1	ffar2	NEGR1
0.006205	0.64239	0.5	0.086	1	ffar2	PKNOX1
0.006206	0.869203	1	0.267	1	ffar2	NLRP1
0.006237	0.660831	0.25	0.026	1	ffar2	MIR1-1HG
0.006261	0.465497	0.25	0.026	1	ffar2	TTPAL
0.006378	0.836022	0.25	0.027	1	ffar2	ANK2-AS1
0.006389	1.24152	0.25	0.028	1	ffar2	APRG1
0.006421	0.456029	0.25	0.026	1	ffar2	ZNF8-DT
0.006437	1.10734	0.75	0.189	1	ffar2	MIB1
0.006445	1.11948	0.75	0.194	1	ffar2	MIA2
0.006455	0.477611	0.25	0.026	1	ffar2	ALDH18A1
0.006514	0.718747	0.25	0.027	1	ffar2	SLC25A39
0.006528	0.465423	0.25	0.026	1	ffar2	MRPS34
0.006539	0.859616	0.25	0.027	1	ffar2	LRIF1
0.006548	1.87926	0.75	0.227	1	ffar2	ARHGAP17
0.006593	0.836624	0.25	0.027	1	ffar2	CKAP4
0.006632	0.832787	0.25	0.027	1	ffar2	TBC1D10B
0.006682	1.28437	0.5	0.099	1	ffar2	WLS
0.006779	0.832577	0.25	0.027	1	ffar2	VLDLR
0.006873	1.67444	0.5	0.11	1	ffar2	ST8SIA4
0.0069	1.22577	0.25	0.028	1	ffar2	PELP1
0.006919	0.658824	0.5	0.088	1	ffar2	RFFL
0.006938	1.3918	0.5	0.102	1	ffar2	RAB31
0.007028	0.735367	0.25	0.027	1	ffar2	SLC52A3
0.007193	1.26877	0.5	0.101	1	ffar2	BNIP2
0.007215	0.925563	0.5	0.093	1	ffar2	TCF12-DT
0.00722	0.47964	0.25	0.027	1	ffar2	ZNF460
0.007237	0.961276	0.75	0.183	1	ffar2	FOXK1
0.007277	0.467051	0.25	0.027	1	ffar2	SMIM13
0.00731	1.09241	0.5	0.096	1	ffar2	TARBP1
0.007373	1.14667	1	0.385	1	ffar2	RAP1B
0.007381	0.691377	0.25	0.027	1	ffar2	LINC02269
0.007438	0.850875	0.25	0.028	1	ffar2	EXOSC9
0.00744	0.701649	0.25	0.027	1	ffar2	CENPT
0.007474	1.03502	0.5	0.096	1	ffar2	USP42
0.007528	0.985389	0.5	0.095	1	ffar2	STX2
0.007646	0.456583	0.25	0.027	1	ffar2	MTRFR
0.007695	1.33929	1	0.701	1	ffar2	DOCK4
0.007696	1.14011	0.5	0.097	1	ffar2	MIR100HG
0.0077	0.705245	0.5	0.09	1	ffar2	NUP54
0.007708	1.19116	0.5	0.099	1	ffar2	TAMM41
0.007719	0.455479	0.25	0.027	1	ffar2	FAM216A
0.007804	1.20832	0.25	0.029	1	ffar2	FBXO36
0.007836	1.26137	0.5	0.099	1	ffar2	SACM1L
0.007887	0.467629	0.25	0.027	1	ffar2	TMEM222
0.008108	0.919919	0.75	0.183	1	ffar2	GLIS3
0.008113	0.474905	0.25	0.028	1	ffar2	RABL2B
0.008135	1.25994	0.25	0.03	1	ffar2	OSBPL7
0.008284	1.15326	1	0.295	1	ffar2	ARHGAP21
0.008292	1.02937	0.5	0.098	1	ffar2	ZBTB7C
0.0083	0.893367	0.25	0.029	1	ffar2	PHYHD1
0.00835	1.27656	0.5	0.105	1	ffar2	NAA50
0.008371	0.69789	0.25	0.028	1	ffar2	BCAT2
0.008378	0.765107	0.75	0.174	1	ffar2	TOP2B
0.00841	1.17841	0.25	0.029	1	ffar2	DNM1
0.008447	0.470843	0.25	0.028	1	ffar2	ZBTB5
0.008494	1.38015	0.75	0.245	1	ffar2	EML4
0.008509	1.04528	0.5	0.098	1	ffar2	TGFBR1
0.008616	0.658508	0.25	0.028	1	ffar2	HNMT
0.008675	1.14597	0.5	0.101	1	ffar2	DEPDC5
0.008767	0.458004	0.25	0.028	1	ffar2	APH1A
0.008773	0.695173	0.25	0.029	1	ffar2	ZNF486
0.008815	0.444494	0.25	0.028	1	ffar2	PLA1A
0.008853	0.455415	0.25	0.028	1	ffar2	TRMT112
0.008863	0.464022	0.25	0.028	1	ffar2	CES2
0.008875	1.002	0.75	0.192	1	ffar2	PIKFYVE
0.00891	0.683553	0.25	0.029	1	ffar2	SLC4A2
0.008934	0.974965	0.5	0.098	1	ffar2	RALB
0.00896	0.605378	0.5	0.091	1	ffar2	PDLIM7
0.008966	0.841017	0.25	0.029	1	ffar2	BUD13
0.008974	1.04969	0.5	0.099	1	ffar2	CKAP5
0.009012	0.453405	0.25	0.028	1	ffar2	RP2
0.009022	1.24558	0.25	0.03	1	ffar2	ZNF677
0.009065	1.20851	0.25	0.03	1	ffar2	LINC00665
0.009124	0.919635	0.25	0.03	1	ffar2	ZNF571
0.009126	0.678812	0.25	0.029	1	ffar2	ECHS1
0.009136	0.81452	0.25	0.029	1	ffar2	TTC31
0.009141	0.925545	1	0.311	1	ffar2	CAPZB
0.009242	0.432212	0.25	0.028	1	ffar2	ADCY3
0.00928	1.19542	0.75	0.221	1	ffar2	DMXL1
0.009296	0.667574	0.5	0.093	1	ffar2	ANKRD27
0.009333	0.458522	0.25	0.028	1	ffar2	THUMPD3
0.009475	1.08384	0.75	0.206	1	ffar2	ANO10
0.009526	0.676405	0.25	0.029	1	ffar2	LOC100507053
0.009528	1.30079	0.75	0.25	1	ffar2	DIP2A
0.009633	0.897314	0.5	0.097	1	ffar2	LRRC28
0.009689	0.712078	0.5	0.094	1	ffar2	ZNF780B
0.009696	0.695493	0.25	0.029	1	ffar2	SETD1A
0.009701	1.01922	0.75	0.197	1	ffar2	KDM7A
0.009737	1.2146	0.25	0.031	1	ffar2	SSRP1
0.009794	0.453285	0.25	0.029	1	ffar2	ARAF
0.009795	0.689502	0.25	0.029	1	ffar2	EIF2B5
0.009875	0.808357	0.25	0.029	1	ffar2	ART3
0.009921	1.19206	0.25	0.031	1	ffar2	DRG2
0.009938	0.417798	0.25	0.029	1	ffar2	CCBE1
0.009952	0.710177	0.25	0.029	1	ffar2	AMOTL2
0.009955	1.0834	0.5	0.102	1	ffar2	PON2
0.009971	0.916717	0.75	0.189	1	ffar2	PPP4R2

## Sheet: sma_ffar_deg_fib
p_val	avg_log2FC	pct.1	pct.2	p_val_adj	cluster	gene
0.003614	1.3314	0.541	0.167	1	ctrl	TFPI
0.004015	1.83597	0.473	0.167	1	ctrl	USP53
0.007644	1.25712	0.63	0.389	1	ctrl	SORBS2
0.008833	1.34209	0.283	0	1	ctrl	ATOSA
0	2.60613	1	0	0	ffar2	FFAR2
4.76e-07	1.38406	0.389	0.078	0.01	ffar2	UCHL3
5.85e-07	1.13339	0.556	0.143	0.012284	ffar2	MAP3K1
8.76e-07	0.961235	0.444	0.097	0.018405	ffar2	ABCE1
1.89e-06	0.732195	0.389	0.079	0.039772	ffar2	ACSF3
1.89e-06	1.37975	0.278	0.046	0.039816	ffar2	JPH1
3.6e-06	0.808627	0.278	0.047	0.075633	ffar2	MTMR8
1.07e-05	0.711892	0.389	0.087	0.224009	ffar2	SLC7A2
1.19e-05	0.892607	0.278	0.052	0.249006	ffar2	PRKAR1B
1.27e-05	0.847894	0.278	0.051	0.267473	ffar2	ABAT
1.8e-05	1.60899	0.389	0.093	0.378161	ffar2	SORCS1
3.21e-05	0.693605	0.278	0.054	0.674697	ffar2	U2AF2
3.36e-05	1.24343	0.444	0.128	0.70681	ffar2	RAI1
4.64e-05	0.584657	0.278	0.055	0.974989	ffar2	TOPORS
7.37e-05	0.712524	0.611	0.209	1	ffar2	ATP6V0A1
7.87e-05	0.558543	0.278	0.057	1	ffar2	SART1
8.31e-05	0.6202	0.278	0.058	1	ffar2	RNF41
8.36e-05	0.661984	0.556	0.182	1	ffar2	RARRES1
0.000148	1.61321	0.556	0.2	1	ffar2	RTN3
0.000157	0.899415	0.833	0.438	1	ffar2	VTI1A
0.000162	0.741136	0.333	0.085	1	ffar2	EEF1G
0.000169	0.879292	0.389	0.108	1	ffar2	CHRDL2
0.000182	0.566323	0.389	0.105	1	ffar2	COLGALT1
0.000195	0.5208	0.444	0.127	1	ffar2	SNX3
0.000229	0.700967	0.389	0.111	1	ffar2	ZFY
0.000302	0.813528	0.833	0.387	1	ffar2	CLMP
0.000325	0.500947	0.278	0.064	1	ffar2	RPAP3
0.000343	0.661271	0.389	0.114	1	ffar2	ST7
0.000355	0.736263	1	0.808	1	ffar2	CHD9
0.000371	0.555582	0.389	0.112	1	ffar2	SARS1
0.00038	0.654058	0.333	0.088	1	ffar2	CHST9
0.000402	0.751979	0.389	0.117	1	ffar2	BIN3
0.000426	0.636047	0.333	0.091	1	ffar2	RPF2
0.000473	1.16811	0.444	0.159	1	ffar2	EXOC6
0.00051	0.569969	0.389	0.114	1	ffar2	ODF2
0.000576	0.531775	0.278	0.068	1	ffar2	TRDMT1
0.000583	0.704484	0.389	0.119	1	ffar2	PLOD1
0.000627	0.787126	0.444	0.152	1	ffar2	EYS
0.000658	0.837755	0.667	0.301	1	ffar2	WIPF1
0.000664	0.935835	0.389	0.131	1	ffar2	SLC25A24
0.000674	0.659059	0.389	0.12	1	ffar2	NIBAN2
0.000679	0.70831	0.444	0.152	1	ffar2	TENT4A
0.000694	1.296	0.278	0.077	1	ffar2	LRIG2-DT
0.000711	0.57442	0.278	0.07	1	ffar2	NT5C
0.000797	0.727667	0.444	0.151	1	ffar2	STK10
0.000821	1.07138	0.389	0.128	1	ffar2	SERGEF
0.000854	0.6676	0.333	0.096	1	ffar2	RPS21
0.000989	0.912947	0.889	0.562	1	ffar2	FRMD4A
0.001002	0.943418	0.389	0.123	1	ffar2	SRFBP1
0.001061	0.61348	0.389	0.123	1	ffar2	FASTKD1
0.001149	0.743987	0.5	0.197	1	ffar2	KLF6
0.001185	0.530518	0.333	0.096	1	ffar2	NUP50-DT
0.001255	0.570849	0.333	0.1	1	ffar2	AMMECR1
0.001306	0.730398	0.611	0.267	1	ffar2	RHOA
0.001334	0.574891	0.278	0.076	1	ffar2	PCCB
0.001358	0.531423	0.333	0.1	1	ffar2	PDCD11
0.001362	0.90821	0.778	0.495	1	ffar2	SOBP
0.001502	0.559422	0.278	0.076	1	ffar2	UHMK1
0.00159	0.414882	0.278	0.074	1	ffar2	TSPAN14
0.001701	1.06788	0.278	0.079	1	ffar2	GRAMD4
0.001845	0.839517	0.444	0.173	1	ffar2	UGCG
0.002034	0.793157	0.333	0.112	1	ffar2	LRRC41
0.002039	0.818797	0.667	0.311	1	ffar2	NR3C2
0.002065	1.08979	0.444	0.17	1	ffar2	NTM
0.002108	0.501427	0.5	0.187	1	ffar2	RIPK1
0.002248	0.529419	0.333	0.104	1	ffar2	HSF1
0.002342	1.24396	0.833	0.574	1	ffar2	PLCB1
0.002362	0.891647	0.833	0.66	1	ffar2	GRK5
0.00237	0.513211	0.278	0.078	1	ffar2	SHFL
0.002393	0.874247	0.889	0.751	1	ffar2	BNC2
0.00244	0.870354	0.611	0.315	1	ffar2	ZNF438
0.002447	0.525574	0.444	0.162	1	ffar2	CSGALNACT2
0.002567	0.771844	0.444	0.189	1	ffar2	RPRD1A
0.002734	0.960728	0.389	0.14	1	ffar2	MTG1
0.002742	1.03366	0.333	0.113	1	ffar2	LPCAT3
0.002812	0.533288	0.278	0.081	1	ffar2	BCL2L14
0.002897	0.808439	0.278	0.083	1	ffar2	PLOD3
0.003144	0.456152	0.278	0.081	1	ffar2	MTHFD2L
0.003153	0.506187	0.444	0.168	1	ffar2	LRIG1
0.003271	1.05991	0.444	0.173	1	ffar2	GRAMD1B
0.003532	0.410597	0.389	0.134	1	ffar2	ANKRD13D
0.003672	0.514222	0.333	0.111	1	ffar2	MSANTD2
0.003707	0.742997	0.389	0.144	1	ffar2	MEOX2
0.003774	0.608472	0.278	0.086	1	ffar2	RUVBL1
0.003919	0.601391	0.5	0.214	1	ffar2	CSRNP3
0.004106	0.806839	0.667	0.348	1	ffar2	ECPAS
0.004229	0.803417	0.611	0.328	1	ffar2	ACACA
0.004238	0.942445	0.5	0.215	1	ffar2	LUZP1
0.004255	0.720097	0.667	0.353	1	ffar2	SERINC5
0.004347	1.08218	0.611	0.386	1	ffar2	ANKS1B
0.004452	0.970245	0.333	0.117	1	ffar2	SUMF2
0.004484	0.718527	0.778	0.457	1	ffar2	PCCA
0.004741	0.429409	0.278	0.085	1	ffar2	SERPINH1
0.004812	0.700426	0.389	0.157	1	ffar2	IRF2
0.005114	0.733926	0.333	0.124	1	ffar2	CASP4
0.005378	0.810283	0.5	0.216	1	ffar2	TRAPPC8
0.005491	0.66152	0.389	0.148	1	ffar2	MRPS27
0.005503	0.522262	0.278	0.088	1	ffar2	CPVL
0.005519	0.508066	0.333	0.118	1	ffar2	ANKS3
0.005559	0.817187	0.278	0.087	1	ffar2	PCED1A
0.005627	0.532723	0.389	0.147	1	ffar2	TTC39C
0.005749	0.90684	0.556	0.298	1	ffar2	RNF111
0.005778	0.746082	0.611	0.311	1	ffar2	NPAS2
0.005932	0.528516	0.556	0.259	1	ffar2	PPP4R2
0.005986	0.511417	0.333	0.119	1	ffar2	AKAP8
0.006028	0.702666	0.944	0.77	1	ffar2	PDLIM5
0.006262	0.499606	0.611	0.283	1	ffar2	ECE1
0.006296	0.496733	0.389	0.148	1	ffar2	ARL13B
0.006376	0.63542	0.556	0.255	1	ffar2	GPI
0.006459	0.449966	0.278	0.088	1	ffar2	EIPR1
0.006666	0.514524	0.5	0.222	1	ffar2	TRAF3
0.006669	0.594131	0.5	0.223	1	ffar2	FBH1
0.00694	0.965124	0.389	0.16	1	ffar2	CARS2
0.007082	0.501362	0.278	0.089	1	ffar2	CMKLR1
0.007213	0.930638	0.444	0.215	1	ffar2	UHRF2
0.007673	0.799827	0.389	0.161	1	ffar2	OTUD7A
0.007933	0.407598	0.333	0.118	1	ffar2	TET3
0.008032	0.50493	0.278	0.094	1	ffar2	VPS37B
0.008122	0.801412	0.278	0.101	1	ffar2	SCARNA17
0.008161	0.716452	0.611	0.305	1	ffar2	FAM120B
0.008429	0.912602	0.444	0.211	1	ffar2	OSBPL10
0.008489	1.31129	0.333	0.138	1	ffar2	ADAMTS19
0.008553	0.832737	0.611	0.337	1	ffar2	GXYLT2
0.008586	0.804006	0.389	0.158	1	ffar2	RND3
0.00864	0.526963	0.389	0.154	1	ffar2	ALS2
0.008724	0.860139	0.333	0.125	1	ffar2	RNF122
0.009083	0.57288	0.333	0.122	1	ffar2	DNAJC2
0.009448	0.961064	0.389	0.174	1	ffar2	TNC
0.009947	0.517191	0.333	0.126	1	ffar2	PRKCH

## Sheet: sma_ffar_deg_cyc
p_val	avg_log2FC	pct.1	pct.2	p_val_adj	cluster	gene
0	3.20535	1	0	0	ffar2	FFAR2
1.16e-217	3.28864	0.333	0	2.44e-213	ffar2	LINC02839
1.16e-217	2.42921	0.333	0	2.44e-213	ffar2	LOC124901604
1.16e-217	2.42921	0.333	0	2.44e-213	ffar2	ZNF729
1.16e-217	2.42921	0.333	0	2.44e-213	ffar2	LOC105375082
1.16e-217	2.42921	0.333	0	2.44e-213	ffar2	E2F5-DT
1.16e-217	2.42921	0.333	0	2.44e-213	ffar2	AMELY
9.85e-110	3.28305	0.333	0	2.07e-105	ffar2	LINC01173
9.85e-110	2.42443	0.333	0	2.07e-105	ffar2	LINC02466
9.85e-110	2.42342	0.333	0	2.07e-105	ffar2	LINC02165
1.02e-73	2.42502	0.333	0.001	2.14e-69	ffar2	ANGPTL7
1.02e-73	2.41844	0.333	0.001	2.14e-69	ffar2	LINC01701
1.02e-73	1.33733	0.333	0.001	2.14e-69	ffar2	PRSS35
1.27e-73	2.41577	0.333	0.001	2.67e-69	ffar2	BPI
1.59e-73	2.41403	0.333	0.001	3.33e-69	ffar2	GABRA6
1.59e-73	2.41385	0.333	0.001	3.33e-69	ffar2	PAX7
1.08e-55	2.42156	0.333	0.001	2.26e-51	ffar2	TMPRSS4
1.5e-55	2.41175	0.333	0.001	3.16e-51	ffar2	PLPPR5-AS1
1.5e-55	2.39542	0.333	0.001	3.16e-51	ffar2	LOC105375826
1.78e-55	2.40599	0.333	0.001	3.73e-51	ffar2	LINC02343
7.87e-47	2.22321	0.667	0.006	1.65e-42	ffar2	HMGA2-AS1
8.24e-45	2.4192	0.333	0.001	1.73e-40	ffar2	NDST4
8.24e-45	2.41631	0.333	0.001	1.73e-40	ffar2	RETREG1-AS1
1.35e-37	2.41187	0.333	0.002	2.84e-33	ffar2	GNAT3
1.77e-32	2.41171	0.333	0.002	3.72e-28	ffar2	LRRC9
1.95e-32	2.41272	0.333	0.002	4.09e-28	ffar2	MAP3K2-DT
2.36e-32	2.38906	0.333	0.002	4.96e-28	ffar2	FSHR
2.59e-32	1.32217	0.333	0.002	5.45e-28	ffar2	LINC01798
1.45e-28	2.40491	0.333	0.002	3.05e-24	ffar2	IL20RA
1.45e-28	2.39952	0.333	0.002	3.05e-24	ffar2	PAX3
1.72e-28	2.38372	0.333	0.002	3.61e-24	ffar2	LOC107985126
2.03e-28	1.32136	0.333	0.002	4.27e-24	ffar2	GOLGA7B
1.51e-25	2.4027	0.333	0.003	3.16e-21	ffar2	PEX5L
1.51e-25	2.3994	0.333	0.003	3.16e-21	ffar2	LINC01122
1.88e-25	1.69702	0.333	0.003	3.95e-21	ffar2	CDH10
1.88e-25	1.31897	0.333	0.003	3.95e-21	ffar2	CCDC17
2.18e-25	1.31779	0.333	0.003	4.59e-21	ffar2	H2AC16
3.91e-23	2.40306	0.333	0.003	8.21e-19	ffar2	A2ML1
4.47e-23	1.70072	0.333	0.003	9.39e-19	ffar2	LINC01970
4.47e-23	1.69385	0.333	0.003	9.39e-19	ffar2	GDA
4.78e-23	1.69527	0.333	0.003	1e-18	ffar2	FBXO39
1.35e-21	2.68872	0.667	0.014	2.83e-17	ffar2	SCAND1
1.57e-19	2.39707	0.333	0.004	3.29e-15	ffar2	MROH9
1.61e-19	2.38838	0.333	0.004	3.38e-15	ffar2	PSMA8
1.85e-19	1.32362	0.333	0.004	3.89e-15	ffar2	LIPT1
3.92e-18	2.38187	0.333	0.004	8.24e-14	ffar2	USP43
4.82e-18	1.3148	0.333	0.004	1.01e-13	ffar2	GCC1
6.22e-17	2.38163	0.333	0.004	1.31e-12	ffar2	LINC02840
6.53e-17	2.39562	0.333	0.004	1.37e-12	ffar2	LOC105379100
6.53e-17	2.38578	0.333	0.004	1.37e-12	ffar2	LIFR-AS1
6.85e-17	1.69849	0.333	0.004	1.44e-12	ffar2	TSPYL5
7.54e-17	1.30993	0.333	0.004	1.58e-12	ffar2	MIR3945HG
7.91e-17	1.31086	0.333	0.004	1.66e-12	ffar2	HSD52
8.3e-17	1.30811	0.333	0.004	1.74e-12	ffar2	CHI3L1
9.57e-17	1.67171	0.333	0.004	2.01e-12	ffar2	CDH3
7.15e-16	2.40012	0.333	0.005	1.5e-11	ffar2	KDM4D
7.32e-16	2.36493	0.333	0.005	1.54e-11	ffar2	CELF5
7.83e-16	2.3839	0.333	0.005	1.64e-11	ffar2	NALCN-AS1
6.34e-15	2.38179	0.333	0.005	1.33e-10	ffar2	NGEF
6.34e-15	2.38057	0.333	0.005	1.33e-10	ffar2	C11orf91
3.57e-14	2.39719	0.333	0.005	7.5e-10	ffar2	HTR4
3.57e-14	2.38571	0.333	0.005	7.5e-10	ffar2	LAMC2
3.71e-14	2.39538	0.333	0.005	7.8e-10	ffar2	EPCIP
3.86e-14	2.36847	0.333	0.005	8.12e-10	ffar2	CCL5
4.18e-14	2.37102	0.333	0.005	8.78e-10	ffar2	NTNG1
4.18e-14	1.31427	0.333	0.005	8.78e-10	ffar2	ARF5
4.71e-14	1.67416	0.333	0.005	9.89e-10	ffar2	GPA33
1.86e-13	2.39679	0.333	0.006	3.9e-09	ffar2	MKLN1-AS
2e-13	2.36487	0.333	0.006	4.21e-09	ffar2	MYH13
2e-13	2.32979	0.333	0.006	4.21e-09	ffar2	SNAP25-AS1
2.08e-13	1.68807	0.333	0.006	4.37e-09	ffar2	PEX11A
2.24e-13	2.35964	0.333	0.006	4.71e-09	ffar2	LOC124902062
2.24e-13	2.34565	0.333	0.006	4.71e-09	ffar2	UNC5D
2.51e-13	1.29664	0.333	0.006	5.27e-09	ffar2	CD101
8.15e-13	2.37813	0.333	0.006	1.71e-08	ffar2	SFRP1
9.06e-13	2.35323	0.333	0.006	1.9e-08	ffar2	COL22A1
9.73e-13	2.34675	0.333	0.006	2.04e-08	ffar2	KSR2
9.73e-13	2.34356	0.333	0.006	2.04e-08	ffar2	SPOCK3
3.41e-12	2.34799	0.333	0.006	7.17e-08	ffar2	MEGF11
3.77e-12	1.28349	0.333	0.006	7.93e-08	ffar2	ST8SIA5
4.46e-12	1.28271	0.333	0.006	9.38e-08	ffar2	LOC105375743
4.62e-12	1.29424	0.333	0.006	9.7e-08	ffar2	FAAH
1.17e-11	2.35861	0.333	0.007	2.46e-07	ffar2	KCNJ6
1.47e-11	1.28013	0.333	0.007	3.08e-07	ffar2	LINC02235
3.6e-11	2.35399	0.333	0.007	7.56e-07	ffar2	CDH20
5.03e-11	2.0272	0.667	0.029	1.06e-06	ffar2	CALHM2
9.18e-11	2.37748	0.333	0.007	1.93e-06	ffar2	CCNO-DT
9.74e-11	2.34601	0.333	0.007	2.05e-06	ffar2	SGCZ
1.58e-10	2.71534	0.667	0.031	3.32e-06	ffar2	LINC02615
2.11e-10	2.43997	0.333	0.008	4.43e-06	ffar2	SIGMAR1
2.11e-10	2.37465	0.333	0.008	4.43e-06	ffar2	PFDN6
5.63e-10	1.67278	0.333	0.008	1.18e-05	ffar2	ANAPC13
5.95e-10	1.29011	0.333	0.008	1.25e-05	ffar2	PELATON
1.33e-09	1.28936	0.333	0.008	2.78e-05	ffar2	COA6-AS1
2.4e-09	2.34865	0.333	0.009	5.04e-05	ffar2	GBX2-AS1
2.72e-09	2.31238	0.333	0.009	5.71e-05	ffar2	LINC02240
2.86e-09	1.27905	0.333	0.009	6e-05	ffar2	ZFP69
3.87e-09	2.65605	0.667	0.037	8.14e-05	ffar2	FBXO10
4.36e-09	2.37263	0.333	0.009	9.17e-05	ffar2	CHRDL2
4.47e-09	2.36665	0.333	0.009	9.39e-05	ffar2	FAHD1
4.69e-09	2.34158	0.333	0.009	9.86e-05	ffar2	GFRA1
5.17e-09	2.32467	0.333	0.009	0.000109	ffar2	HPD
1.5e-08	2.33434	0.333	0.01	0.000316	ffar2	ANO4
1.61e-08	2.32527	0.333	0.01	0.000338	ffar2	GPT
1.65e-08	2.3122	0.333	0.01	0.000346	ffar2	NMNAT2
1.76e-08	2.31498	0.333	0.01	0.00037	ffar2	LINC02237
2.55e-08	3.22555	0.333	0.01	0.000536	ffar2	CAV3
3.64e-08	2.63998	0.667	0.042	0.000765	ffar2	PRMT1
6.65e-08	1.24571	0.333	0.01	0.001398	ffar2	NLE1
8.01e-08	1.65311	0.333	0.011	0.001683	ffar2	PEX19
8.01e-08	1.6518	0.333	0.011	0.001683	ffar2	CHD1L
8.34e-08	1.63668	0.333	0.011	0.001753	ffar2	GALNT7-DT
1.09e-07	2.35191	0.333	0.011	0.002301	ffar2	LOC101926907
1.12e-07	2.3646	0.333	0.011	0.002347	ffar2	GINS2
1.14e-07	2.34077	0.333	0.011	0.002395	ffar2	WIPF3
1.32e-07	2.00922	0.667	0.045	0.002767	ffar2	SELENOT
1.79e-07	2.31406	0.333	0.011	0.003754	ffar2	KCTD17
2.21e-07	1.62946	0.333	0.011	0.004644	ffar2	FBXW9
2.34e-07	1.25069	0.333	0.011	0.004921	ffar2	VPS25
2.68e-07	2.33825	0.333	0.012	0.005633	ffar2	PWWP2B
2.78e-07	2.32817	0.333	0.012	0.00585	ffar2	DLEU7
3.24e-07	1.6281	0.333	0.012	0.006801	ffar2	KLHL26
3.36e-07	1.26316	0.333	0.012	0.007061	ffar2	FIZ1
3.79e-07	2.33063	0.333	0.012	0.007974	ffar2	EPB41L4B
3.84e-07	2.44971	1	0.111	0.00807	ffar2	RASGEF1B
5e-07	1.22956	0.333	0.012	0.010498	ffar2	H2BC11
5.53e-07	1.91546	0.667	0.048	0.011614	ffar2	VSIR
6.9e-07	1.26016	0.333	0.012	0.014498	ffar2	SERPINB8
7.27e-07	1.87814	0.667	0.048	0.015269	ffar2	IPP
7.6e-07	2.36608	0.333	0.013	0.015977	ffar2	SPDYE3
7.81e-07	1.24096	0.333	0.012	0.016417	ffar2	MCOLN2
9.21e-07	1.63001	0.333	0.013	0.019357	ffar2	ZNF275
9.39e-07	1.84711	0.667	0.049	0.019725	ffar2	KCND3
1.04e-06	1.24705	0.333	0.013	0.021856	ffar2	MUC20
1.11e-06	2.30904	0.333	0.013	0.0234	ffar2	TRMT10A
1.28e-06	2.24791	0.333	0.013	0.02681	ffar2	CDH18
1.52e-06	2.29496	0.333	0.013	0.032011	ffar2	ATP6V0D2
2.23e-06	1.19681	0.333	0.013	0.046805	ffar2	IRF2BPL
2.55e-06	1.90351	0.667	0.054	0.053612	ffar2	STRAP
2.65e-06	2.33623	0.333	0.014	0.055591	ffar2	NDUFAF4
2.82e-06	2.28135	0.333	0.014	0.059238	ffar2	CPA6
2.91e-06	1.64298	0.333	0.014	0.061146	ffar2	RAC2
3.02e-06	1.222	0.333	0.014	0.063551	ffar2	AQP9
3.22e-06	1.2135	0.333	0.014	0.067747	ffar2	HMGA1
3.65e-06	2.43847	0.667	0.057	0.076786	ffar2	TRIM54
3.88e-06	2.27584	0.333	0.014	0.081426	ffar2	TMEM132C
3.94e-06	2.26986	0.333	0.014	0.082696	ffar2	LNC-LBCS
4.45e-06	3.19781	0.333	0.015	0.09341	ffar2	ARG2
4.59e-06	1.18216	0.333	0.014	0.096396	ffar2	TRAPPC14
4.65e-06	2.29065	0.333	0.015	0.097771	ffar2	IGSF11
4.74e-06	1.85265	0.667	0.056	0.099644	ffar2	BAG6
5.66e-06	1.59225	0.333	0.015	0.119027	ffar2	APOBEC3C
7.24e-06	1.60115	0.333	0.015	0.152103	ffar2	SLC22A3
7.26e-06	1.80328	0.667	0.057	0.152486	ffar2	SHROOM3
8.89e-06	1.21436	0.333	0.015	0.186816	ffar2	RFLNB
9.67e-06	2.28187	0.333	0.016	0.203257	ffar2	CFB
1.01e-05	1.63021	0.333	0.016	0.212133	ffar2	SNHG15
1.04e-05	1.2257	0.333	0.015	0.21902	ffar2	LYSMD4
1.07e-05	2.19886	0.333	0.016	0.224544	ffar2	HSPA1B
1.07e-05	1.20464	0.333	0.015	0.225398	ffar2	CAVIN4
1.13e-05	2.22488	0.333	0.016	0.237647	ffar2	GALNTL6
1.21e-05	2.27142	0.333	0.016	0.25322	ffar2	FASN
1.24e-05	2.25455	0.333	0.016	0.260393	ffar2	TAFA1
1.27e-05	1.22413	0.333	0.016	0.266075	ffar2	PQBP1
1.42e-05	1.8106	0.667	0.062	0.29784	ffar2	BIN2
1.45e-05	2.29757	0.333	0.016	0.304299	ffar2	STAC3
1.61e-05	1.21242	0.333	0.016	0.338935	ffar2	CBX4
1.75e-05	2.28777	0.333	0.017	0.368026	ffar2	HS3ST3B1
1.8e-05	2.30908	0.333	0.017	0.378068	ffar2	CELF6
2.09e-05	1.19953	0.333	0.016	0.439367	ffar2	LINC02930
2.23e-05	1.21883	0.333	0.017	0.468348	ffar2	GTF3C4
2.38e-05	2.26797	0.333	0.017	0.500895	ffar2	FAM184B
2.43e-05	2.22025	0.333	0.017	0.510865	ffar2	CHODL
2.47e-05	2.32777	0.667	0.069	0.518979	ffar2	FAM20B
2.8e-05	1.84223	0.667	0.068	0.589375	ffar2	NUDT5
3.04e-05	1.20728	0.333	0.017	0.637887	ffar2	CRYGS
3.04e-05	1.19315	0.333	0.017	0.637887	ffar2	SATB2
3.21e-05	2.26774	0.333	0.018	0.674272	ffar2	HCG23
3.46e-05	1.61433	0.333	0.018	0.727629	ffar2	ZNF530
3.64e-05	2.32271	0.333	0.018	0.764013	ffar2	DTD2
3.69e-05	1.61336	0.333	0.018	0.775132	ffar2	TTC32
3.73e-05	2.27588	0.333	0.018	0.78338	ffar2	ACE
3.74e-05	2.20328	0.333	0.018	0.78498	ffar2	ANO3
3.89e-05	2.39291	0.667	0.073	0.81821	ffar2	RNF180
4.08e-05	1.55118	0.333	0.018	0.857312	ffar2	TMEM156
4.53e-05	2.27521	0.333	0.018	0.950991	ffar2	ZNF382
4.66e-05	1.57292	0.333	0.018	0.979936	ffar2	ZNF433
5.07e-05	1.80514	0.667	0.071	1	ffar2	NFKBID
6.01e-05	2.2055	0.667	0.073	1	ffar2	PPP1R13L
6.01e-05	1.57632	0.333	0.019	1	ffar2	TRMT2A
6.16e-05	2.27448	0.333	0.019	1	ffar2	BCS1L
6.27e-05	2.2723	0.333	0.019	1	ffar2	SMO
6.69e-05	1.21793	0.333	0.019	1	ffar2	TAGAP
7.7e-05	1.85755	0.333	0.019	1	ffar2	JAKMIP2
7.97e-05	1.59825	0.333	0.019	1	ffar2	SH3BP5L
9.08e-05	1.11167	0.333	0.019	1	ffar2	ITGB1-DT
9.49e-05	2.29218	0.333	0.02	1	ffar2	ELK1
9.81e-05	1.18548	0.333	0.019	1	ffar2	CDIP1
9.82e-05	2.26451	0.333	0.02	1	ffar2	C17orf75
9.99e-05	1.56819	0.333	0.02	1	ffar2	LRGUK
0.000102	1.19053	0.333	0.019	1	ffar2	FHL3
0.000103	1.60274	0.333	0.02	1	ffar2	BAG5
0.000103	2.21123	0.333	0.02	1	ffar2	MYH14
0.000107	2.28954	0.333	0.02	1	ffar2	ARMH1
0.000108	1.15107	0.333	0.019	1	ffar2	LINC01500
0.000109	1.7013	0.667	0.074	1	ffar2	BMAL2
0.000113	1.16583	0.333	0.019	1	ffar2	MACC1
0.000113	1.50455	0.333	0.02	1	ffar2	DPP6
0.000118	1.64737	0.667	0.074	1	ffar2	RGS1
0.00012	1.17904	0.333	0.02	1	ffar2	UROD
0.000122	3.12571	0.333	0.021	1	ffar2	LOC124903183
0.000144	1.21591	0.333	0.02	1	ffar2	DNASE1L1
0.000155	2.21025	0.333	0.021	1	ffar2	KIRREL3
0.000165	1.98782	1	0.183	1	ffar2	ST3GAL6
0.000166	2.23751	0.333	0.021	1	ffar2	APBA3
0.000168	2.12526	1	0.208	1	ffar2	ZNF652
0.00017	2.15186	0.667	0.081	1	ffar2	ITPKC
0.000187	1.75687	0.667	0.084	1	ffar2	RAB21
0.000195	2.09946	0.667	0.088	1	ffar2	NLN
0.000205	2.28916	0.333	0.022	1	ffar2	DANCR
0.000206	2.52408	1	0.199	1	ffar2	S100PBP
0.000212	1.20991	0.333	0.021	1	ffar2	SCNM1
0.000235	2.23613	0.333	0.023	1	ffar2	DNAJB2
0.000236	1.20795	0.333	0.022	1	ffar2	ZSCAN25
0.000237	1.21055	0.333	0.022	1	ffar2	SNRPB2
0.000245	1.12188	0.333	0.021	1	ffar2	LINC00299
0.000247	2.18324	0.333	0.023	1	ffar2	PKN2-AS1
0.000251	1.17199	0.333	0.022	1	ffar2	TIMM23B
0.000267	2.22448	0.333	0.023	1	ffar2	CACNA1D
0.000277	1.55968	0.333	0.023	1	ffar2	USP19
0.000297	1.49193	0.333	0.022	1	ffar2	SHISA6
0.000304	1.72043	0.667	0.088	1	ffar2	ERGIC2
0.00034	1.93484	1	0.205	1	ffar2	MGA
0.000362	1.16055	0.333	0.023	1	ffar2	COMMD3
0.000384	1.67958	0.667	0.089	1	ffar2	TRPM2
0.000396	2.25523	0.333	0.024	1	ffar2	DSCAML1
0.000401	1.14776	0.333	0.023	1	ffar2	MSRB2
0.000405	1.93701	1	0.213	1	ffar2	RSU1
0.000408	2.34196	0.667	0.099	1	ffar2	RPL22
0.000433	2.26144	0.333	0.025	1	ffar2	TNFRSF12A
0.000449	1.16296	0.333	0.024	1	ffar2	PEX11B
0.000449	1.16341	0.333	0.024	1	ffar2	TCN2
0.000466	1.13115	0.333	0.024	1	ffar2	TRUB2
0.000478	2.24461	0.333	0.025	1	ffar2	ASB18
0.000498	1.5676	0.333	0.025	1	ffar2	CEP41
0.000506	1.19124	0.333	0.024	1	ffar2	RFT1
0.000519	1.14483	0.333	0.024	1	ffar2	ACAD8
0.000552	2.2211	0.333	0.025	1	ffar2	PARP16
0.000577	2.2527	0.333	0.026	1	ffar2	ZBTB7B
0.000593	1.13653	0.333	0.024	1	ffar2	SHC2
0.000594	1.55778	0.333	0.025	1	ffar2	RPUSD4
0.000598	1.09746	0.333	0.024	1	ffar2	EGFLAM
0.000616	1.5182	0.333	0.025	1	ffar2	ZSCAN21
0.000633	1.17234	0.333	0.025	1	ffar2	SSR4
0.000642	2.26987	0.333	0.026	1	ffar2	GRINA
0.000661	1.88956	1	0.23	1	ffar2	PPP2R2A
0.000691	2.05724	0.667	0.1	1	ffar2	ZNF398
0.000703	2.22619	0.333	0.026	1	ffar2	BNIP1
0.000726	1.6324	0.667	0.096	1	ffar2	MGAT1
0.00073	1.63237	0.667	0.095	1	ffar2	PSMD7
0.000748	2.23178	0.333	0.027	1	ffar2	EIF4E3
0.000748	2.2151	0.333	0.027	1	ffar2	SLC5A6
0.000787	1.18351	0.333	0.026	1	ffar2	ZNF92
0.00082	1.45015	0.667	0.091	1	ffar2	MMP19
0.00084	1.1334	0.333	0.026	1	ffar2	PHB2
0.00084	2.17002	0.333	0.027	1	ffar2	AGBL4
0.000918	2.19915	0.333	0.027	1	ffar2	TIRAP
0.000919	2.08319	0.667	0.105	1	ffar2	ZC3H7B
0.000955	1.52313	0.333	0.027	1	ffar2	TRG-AS1
0.000991	1.56247	0.333	0.027	1	ffar2	ANKRD23
0.000991	1.44563	0.333	0.026	1	ffar2	C8orf34
0.000991	1.13365	0.333	0.026	1	ffar2	A1BG-AS1
0.000994	1.48813	0.333	0.027	1	ffar2	ATOSB
0.001045	1.5844	0.667	0.1	1	ffar2	ADGRA3
0.001046	1.14763	0.333	0.027	1	ffar2	LOC105374344
0.001046	1.139	0.333	0.027	1	ffar2	TMEM150B
0.001053	1.59638	0.333	0.028	1	ffar2	LINC01176
0.001068	1.52577	0.333	0.027	1	ffar2	TRIM3
0.001082	1.14288	0.333	0.027	1	ffar2	YJU2
0.001088	1.52991	0.333	0.028	1	ffar2	PSMB4
0.001091	2.08354	0.667	0.108	1	ffar2	GLIPR2
0.001107	2.2135	0.333	0.028	1	ffar2	SLC25A30
0.001124	1.72082	1	0.231	1	ffar2	PCDH7
0.001149	1.96504	1	0.264	1	ffar2	TBC1D4
0.001172	1.51659	0.333	0.028	1	ffar2	CYB5A
0.001189	1.12857	0.333	0.027	1	ffar2	C1orf174
0.001192	1.1667	0.333	0.028	1	ffar2	METTL23
0.001203	1.60421	0.667	0.103	1	ffar2	CRY1
0.001241	1.54695	0.333	0.028	1	ffar2	ABHD10
0.001262	1.13311	0.333	0.027	1	ffar2	CPT1B
0.001326	1.1758	0.333	0.028	1	ffar2	THAP6
0.001347	1.15642	0.333	0.028	1	ffar2	GNG10
0.00135	2.22685	0.333	0.029	1	ffar2	MRPL32
0.001357	1.49097	0.333	0.028	1	ffar2	TSIX
0.001375	2.13073	0.333	0.029	1	ffar2	BOP1
0.001384	2.29113	0.667	0.121	1	ffar2	SPI1
0.001415	1.14563	0.333	0.028	1	ffar2	LIG3
0.001431	2.10248	0.333	0.029	1	ffar2	CCDC26
0.001431	1.54651	0.333	0.029	1	ffar2	PGBD1
0.001459	1.46421	0.333	0.028	1	ffar2	SESN2
0.001476	2.1686	0.667	0.119	1	ffar2	KYNU
0.001492	2.18588	0.333	0.03	1	ffar2	DELEC1
0.001519	1.13982	0.333	0.028	1	ffar2	BLOC1S2
0.001519	1.15619	0.333	0.028	1	ffar2	B4GALT4
0.00157	1.54367	0.667	0.105	1	ffar2	CTBP1
0.001614	1.555	0.333	0.03	1	ffar2	SCRN3
0.001655	1.44042	0.333	0.029	1	ffar2	SOX2-OT
0.001681	1.57428	1	0.23	1	ffar2	TYMP
0.001695	1.89671	0.667	0.111	1	ffar2	NDRG3
0.001703	1.14203	0.333	0.029	1	ffar2	RBM45
0.001716	2.18365	0.333	0.03	1	ffar2	STS
0.001745	2.16817	0.667	0.121	1	ffar2	DDX39A
0.001802	2.24281	0.333	0.031	1	ffar2	HMGCS1
0.001805	1.53447	0.333	0.03	1	ffar2	KLF11
0.001852	1.56756	0.667	0.112	1	ffar2	HERPUD1
0.001913	1.5657	0.667	0.112	1	ffar2	CYB5R4
0.001926	2.23031	0.667	0.127	1	ffar2	IFT122
0.001999	1.50219	0.333	0.03	1	ffar2	RAB3IP
0.002022	2.14578	0.333	0.031	1	ffar2	KLC2
0.002076	1.07761	0.333	0.029	1	ffar2	RUNX3
0.002228	1.5152	0.333	0.031	1	ffar2	ANKRD42-DT
0.002248	2.15363	0.333	0.032	1	ffar2	MOCOS
0.002307	1.5229	0.667	0.114	1	ffar2	PLEKHM3
0.002367	1.5394	0.333	0.032	1	ffar2	KDELR2
0.002419	1.69075	1	0.305	1	ffar2	NAALADL2
0.002449	1.07709	0.333	0.03	1	ffar2	PDGFRL
0.002453	2.16691	0.333	0.032	1	ffar2	MIB2
0.002455	1.53017	0.333	0.032	1	ffar2	MLX
0.002473	1.50795	0.333	0.032	1	ffar2	CYP2R1
0.002523	2.21734	0.333	0.033	1	ffar2	SIGLEC9
0.002563	2.22901	0.667	0.138	1	ffar2	DOP1A
0.00264	1.10044	0.333	0.031	1	ffar2	ZNF444
0.002641	1.11688	0.333	0.031	1	ffar2	SIRT3
0.002679	1.05794	0.333	0.031	1	ffar2	SCAMP5
0.00268	1.13941	0.333	0.031	1	ffar2	ZKSCAN8
0.002781	1.9771	0.667	0.123	1	ffar2	IRF3
0.002794	1.88715	0.667	0.12	1	ffar2	UTP6
0.00282	1.11163	0.333	0.031	1	ffar2	VAMP8
0.002837	1.49317	0.667	0.113	1	ffar2	WDR90
0.002877	1.13804	0.333	0.032	1	ffar2	NUDT2
0.002952	1.44052	0.667	0.114	1	ffar2	NMT2
0.00297	2.14901	0.333	0.033	1	ffar2	PBLD
0.003009	1.51143	0.333	0.033	1	ffar2	BORCS7
0.003073	1.50024	0.333	0.033	1	ffar2	CCDC107
0.003078	1.88361	0.667	0.124	1	ffar2	LASP1
0.003225	1.8922	0.667	0.125	1	ffar2	ADCY3
0.003267	2.19034	0.333	0.034	1	ffar2	LMLN
0.003303	1.15078	0.333	0.033	1	ffar2	DUSP10
0.003333	1.48469	0.333	0.033	1	ffar2	UGDH
0.003335	2.13428	0.333	0.034	1	ffar2	JAM2
0.003356	1.48159	0.333	0.033	1	ffar2	C2CD6
0.003392	1.51682	0.333	0.034	1	ffar2	LOC105376244
0.003406	1.82926	0.667	0.122	1	ffar2	ARHGDIA
0.003451	1.4336	0.667	0.118	1	ffar2	RHBDF2
0.003485	1.03608	0.333	0.032	1	ffar2	SRF
0.003502	1.08172	0.333	0.032	1	ffar2	BEND7
0.003527	1.08391	0.333	0.032	1	ffar2	SLC1A1
0.003582	1.4102	0.333	0.033	1	ffar2	FGD1
0.003591	1.75283	1	0.336	1	ffar2	DNAJC5
0.003657	1.09922	0.333	0.033	1	ffar2	LZIC
0.003722	1.44538	0.333	0.033	1	ffar2	SDR39U1
0.00375	2.20554	0.333	0.035	1	ffar2	EMC1-AS1
0.004001	1.49403	0.333	0.035	1	ffar2	PPP1R7
0.004037	1.84844	0.667	0.139	1	ffar2	PRKACB
0.004052	1.10278	0.333	0.034	1	ffar2	DNAJA2
0.004055	1.05489	0.333	0.033	1	ffar2	FHIP1A
0.004083	2.11058	0.333	0.035	1	ffar2	TRPM3
0.004109	1.99292	0.667	0.137	1	ffar2	PIK3CD
0.004184	2.10024	0.333	0.036	1	ffar2	CELSR1
0.004191	1.09594	0.333	0.034	1	ffar2	LST1
0.004219	1.8739	1	0.383	1	ffar2	NAMPT
0.004345	1.58362	1	0.289	1	ffar2	SH3KBP1
0.004373	1.96251	0.667	0.134	1	ffar2	TENT4B
0.004434	1.09957	0.333	0.034	1	ffar2	PROCA1
0.004435	2.27889	0.667	0.155	1	ffar2	LDLRAD3
0.004723	1.09262	0.333	0.035	1	ffar2	CCNG2
0.004765	1.44716	0.333	0.035	1	ffar2	STYXL2
0.004862	1.47601	0.333	0.036	1	ffar2	P4HA3
0.004928	2.19608	0.333	0.037	1	ffar2	RPP30
0.005011	1.0727	0.333	0.035	1	ffar2	CANT1
0.005055	1.43962	0.333	0.036	1	ffar2	QARS1
0.005056	1.75433	0.333	0.037	1	ffar2	CYP27A1
0.00511	1.07761	0.333	0.035	1	ffar2	ZBED3-AS1
0.005182	1.10235	0.333	0.035	1	ffar2	MAPKAPK3
0.005184	2.11195	0.333	0.037	1	ffar2	C2orf92
0.00528	2.10024	0.333	0.037	1	ffar2	TMEM120A
0.005374	1.66846	1	0.346	1	ffar2	MBD5
0.00541	2.21923	0.333	0.038	1	ffar2	LOC101928012
0.005419	2.03073	0.333	0.037	1	ffar2	SAMD3
0.005493	1.04331	0.333	0.035	1	ffar2	MAST3
0.005601	1.04402	0.333	0.035	1	ffar2	BCL7A
0.005632	1.46131	0.333	0.037	1	ffar2	ACSS1
0.005673	1.01288	0.333	0.035	1	ffar2	PCAT1
0.005793	1.88181	0.667	0.14	1	ffar2	PDXK
0.005931	1.06602	0.333	0.036	1	ffar2	NCBP2
0.005933	1.06598	0.333	0.036	1	ffar2	MLF2
0.00605	1.48054	0.333	0.038	1	ffar2	URM1
0.006305	1.08211	0.333	0.037	1	ffar2	C3orf62
0.006391	1.02563	0.333	0.036	1	ffar2	TRMT9B
0.006462	1.46532	0.333	0.038	1	ffar2	RRP15
0.006474	1.43966	0.333	0.038	1	ffar2	TMC8
0.006538	2.0721	0.333	0.039	1	ffar2	ZSWIM5
0.006556	1.97023	0.667	0.155	1	ffar2	C11orf58
0.00658	1.40236	0.667	0.135	1	ffar2	PCYT1A
0.006678	2.24042	0.667	0.17	1	ffar2	BLM
0.006697	2.10143	0.333	0.039	1	ffar2	CCDC126
0.006909	1.06591	0.333	0.037	1	ffar2	CTNS
0.00709	2.69865	0.333	0.04	1	ffar2	TM4SF19
0.007149	1.12891	0.333	0.038	1	ffar2	PYROXD1
0.007236	1.40217	0.333	0.038	1	ffar2	MOXD1
0.007606	1.70322	0.667	0.154	1	ffar2	POLD3
0.007823	2.10184	0.333	0.041	1	ffar2	MBD6
0.00794	1.91096	0.667	0.161	1	ffar2	PLPP3
0.008034	1.05337	0.333	0.038	1	ffar2	SOCS3
0.008068	2.1043	0.333	0.041	1	ffar2	PIGQ
0.008179	1.07604	0.333	0.039	1	ffar2	RPL19
0.00818	1.02438	0.333	0.038	1	ffar2	CCDC85B
0.008281	1.87743	0.667	0.159	1	ffar2	ENOX1
0.008303	2.07665	0.333	0.041	1	ffar2	MME
0.008574	1.0688	0.333	0.039	1	ffar2	INSIG1
0.008617	2.10819	0.333	0.042	1	ffar2	MTFR1L
0.008666	2.16141	0.333	0.042	1	ffar2	KLHL36
0.008716	1.08303	0.333	0.039	1	ffar2	MOGS
0.008897	1.30768	0.667	0.135	1	ffar2	MARCKS
0.008965	2.03487	0.333	0.042	1	ffar2	EPHB1
0.009099	1.40491	1	0.396	1	ffar2	CSNK1A1
0.009531	1.46454	0.333	0.041	1	ffar2	SNRPB
0.009572	1.77472	0.667	0.156	1	ffar2	BRD9
0.00981	1.70337	0.333	0.042	1	ffar2	ABHD6
0.009817	1.04219	0.333	0.04	1	ffar2	ACTR6
0.009873	1.05241	0.333	0.04	1	ffar2	RSPH3
0.009895	1.38556	0.667	0.146	1	ffar2	HMGXB3
0.009929	1.75839	0.667	0.154	1	ffar2	ACBD3
0.009959	1.29487	0.667	0.14	1	ffar2	HSPD1

## Sheet: sma_ffar_deg_lym
p_val	avg_log2FC	pct.1	pct.2	p_val_adj	cluster	gene
0	3.50976	1	0	0	ffar2	FFAR2
5.86e-277	0.868824	0.25	0	1.23e-272	ffar2	LINC01048
2.06e-93	0.86727	0.25	0	4.34e-89	ffar2	PRICKLE2-AS3
2.44e-93	0.864357	0.25	0	5.12e-89	ffar2	CLDN1
1.83e-70	0.866009	0.25	0.001	3.85e-66	ffar2	BLID
2.36e-70	0.862814	0.25	0.001	4.95e-66	ffar2	SMAD1-AS2
1.22e-56	1.88072	0.25	0.001	2.57e-52	ffar2	GCNT3
1.35e-56	1.65262	0.25	0.001	2.84e-52	ffar2	CALCA
1.35e-56	0.861061	0.25	0.001	2.84e-52	ffar2	LINC02610
1.35e-56	0.860926	0.25	0.001	2.84e-52	ffar2	CLDN18
1.88e-47	1.64677	0.25	0.001	3.95e-43	ffar2	SRGAP3-AS4
2.04e-47	1.39468	0.25	0.001	4.29e-43	ffar2	LOC101929427
8.59e-41	0.858576	0.25	0.001	1.81e-36	ffar2	LINC02983
8.59e-41	0.858065	0.25	0.001	1.81e-36	ffar2	OXTR
6.68e-36	1.71938	0.25	0.001	1.4e-31	ffar2	BATF2
5.34e-32	0.858083	0.25	0.002	1.12e-27	ffar2	ZFX-AS1
6.78e-29	0.849159	0.25	0.002	1.42e-24	ffar2	KLK14
1.79e-26	1.71703	0.25	0.002	3.77e-22	ffar2	ESYT3
1.96e-26	0.850892	0.25	0.002	4.13e-22	ffar2	MRAP
2.04e-24	1.72015	0.25	0.002	4.29e-20	ffar2	LMNTD2-AS1
2.62e-24	0.844817	0.25	0.002	5.51e-20	ffar2	CBX8
1.17e-22	1.71862	0.25	0.002	2.46e-18	ffar2	PAFAH1B3
1.17e-22	1.64268	0.25	0.002	2.46e-18	ffar2	RNASEH2A
1.42e-22	0.854698	0.25	0.002	2.98e-18	ffar2	LOC124900656
1.65e-22	0.849931	0.25	0.002	3.48e-18	ffar2	MPV17L2
5.39e-21	0.846451	0.25	0.003	1.13e-16	ffar2	RXRG
5.59e-21	0.84067	0.25	0.003	1.17e-16	ffar2	RAPSN
9.37e-20	1.85489	0.25	0.003	1.97e-15	ffar2	ENPP3
1.18e-19	0.834404	0.25	0.003	2.49e-15	ffar2	DAGLA
1.22e-19	0.835954	0.25	0.003	2.57e-15	ffar2	FSHR
1.61e-18	0.839959	0.25	0.003	3.38e-14	ffar2	NPHP3-AS1
1.71e-18	0.838397	0.25	0.003	3.6e-14	ffar2	MRGPRF
1.24e-17	1.86304	0.25	0.003	2.6e-13	ffar2	LINC01909
1.48e-17	1.37079	0.25	0.003	3.1e-13	ffar2	LZTS3
1.71e-17	0.833495	0.25	0.003	3.6e-13	ffar2	TSKS
1.76e-17	0.840524	0.25	0.003	3.71e-13	ffar2	VCAN-AS1
1.76e-17	0.83345	0.25	0.003	3.71e-13	ffar2	SPACA9
1.76e-17	0.823079	0.25	0.003	3.71e-13	ffar2	PDE6A
1.19e-16	1.6995	0.25	0.003	2.49e-12	ffar2	SGK2
1.29e-16	0.839831	0.25	0.003	2.71e-12	ffar2	FAM163A
1.52e-16	0.821708	0.25	0.003	3.2e-12	ffar2	LINC01416
7.27e-16	1.62479	0.25	0.004	1.53e-11	ffar2	LRRN4CL
9.41e-16	2.3167	0.5	0.015	1.98e-11	ffar2	RPP14
3.72e-15	1.63289	0.25	0.004	7.82e-11	ffar2	SAC3D1
4.55e-15	0.839542	0.25	0.004	9.56e-11	ffar2	CELF2-AS2
4.9e-15	0.830795	0.25	0.004	1.03e-10	ffar2	LOC102723692
5.03e-15	0.828717	0.25	0.004	1.06e-10	ffar2	FBXW10B
5.16e-15	0.823361	0.25	0.004	1.08e-10	ffar2	UBAC2-AS1
1.93e-14	1.69157	0.25	0.004	4.05e-10	ffar2	ANKRD35
2.34e-14	0.832211	0.25	0.004	4.91e-10	ffar2	LYRM4-AS1
6.86e-14	1.70315	0.25	0.004	1.44e-09	ffar2	NAALADL1
6.86e-14	1.6261	0.25	0.004	1.44e-09	ffar2	TUBB2A
7.52e-14	1.69386	0.25	0.004	1.58e-09	ffar2	POU5F1
2.39e-13	1.62319	0.25	0.004	5.02e-09	ffar2	SNHG11
3.46e-13	0.832232	0.25	0.004	7.27e-09	ffar2	SLC35D2-HSD17B3
3.54e-13	0.823856	0.25	0.004	7.43e-09	ffar2	CFAP68
8.5e-13	1.6126	0.25	0.005	1.79e-08	ffar2	AIF1
1.12e-12	0.82315	0.25	0.005	2.34e-08	ffar2	FAM174A-DT
2.28e-12	1.84483	0.25	0.005	4.79e-08	ffar2	SERTAD3
5.68e-12	2.45657	0.25	0.005	1.19e-07	ffar2	UNC119B
7e-12	1.79099	0.5	0.019	1.47e-07	ffar2	FIRRE
8.53e-12	0.81396	0.25	0.005	1.79e-07	ffar2	LNCTAM34A
1.59e-11	1.61438	0.25	0.005	3.35e-07	ffar2	MIEF2
1.72e-11	1.60889	0.25	0.005	3.61e-07	ffar2	POP7
2.15e-11	0.821966	0.25	0.005	4.51e-07	ffar2	LINC02803
3.56e-11	2.37477	0.5	0.022	7.48e-07	ffar2	H2AZ1
3.94e-11	1.68119	0.25	0.005	8.28e-07	ffar2	TRAPPC2B
4.39e-11	1.58466	0.25	0.005	9.22e-07	ffar2	HSPA12B
4.8e-11	0.829362	0.25	0.005	1.01e-06	ffar2	LIPT1
7.97e-11	1.8408	0.25	0.006	1.67e-06	ffar2	LINC02193
1.07e-10	0.82743	0.25	0.006	2.25e-06	ffar2	ZNF74
1.11e-10	0.809439	0.25	0.006	2.33e-06	ffar2	ADORA2A-AS1
1.21e-10	0.791011	0.25	0.006	2.54e-06	ffar2	ADAMTS18
2.3e-10	0.815813	0.25	0.006	4.84e-06	ffar2	KBTBD7
2.46e-10	0.810932	0.25	0.006	5.17e-06	ffar2	MMP15
2.46e-10	0.806806	0.25	0.006	5.17e-06	ffar2	LOC112268419
3.3e-10	1.68281	0.25	0.006	6.93e-06	ffar2	RELL2
3.35e-10	1.6953	0.25	0.006	7.04e-06	ffar2	CCDC71
5.44e-10	2.1617	0.75	0.053	1.14e-05	ffar2	ESR2
5.48e-10	1.76949	0.5	0.024	1.15e-05	ffar2	C21orf58
1.36e-09	1.66376	0.25	0.006	2.86e-05	ffar2	ADAMTSL5
1.6e-09	1.77461	0.5	0.025	3.36e-05	ffar2	MRPL47
2.11e-09	1.80821	0.5	0.025	4.42e-05	ffar2	HAUS2
2.6e-09	1.57519	0.25	0.007	5.46e-05	ffar2	TMC7
5.29e-09	0.802335	0.25	0.007	0.000111	ffar2	LOC645485
5.37e-09	0.810741	0.25	0.007	0.000113	ffar2	TMEM177
5.44e-09	0.779884	0.25	0.007	0.000114	ffar2	CYP4F22
6.48e-09	1.8273	0.5	0.027	0.000136	ffar2	KHNYN
9e-09	0.808008	0.25	0.007	0.000189	ffar2	VASH1-AS1
1.06e-08	2.25057	0.75	0.063	0.000223	ffar2	MZF1
1.08e-08	1.58896	0.25	0.007	0.000226	ffar2	NLGN3
1.41e-08	0.803169	0.25	0.007	0.000297	ffar2	GPR18
1.43e-08	0.798631	0.25	0.007	0.000301	ffar2	ARHGEF38
1.45e-08	0.795518	0.25	0.007	0.000305	ffar2	OLFML3
1.51e-08	1.81736	0.5	0.028	0.000318	ffar2	ALG12
1.68e-08	1.34859	0.25	0.007	0.000353	ffar2	LOC100506551
1.74e-08	1.77044	0.5	0.028	0.000365	ffar2	EXD2
3.64e-08	0.788116	0.25	0.008	0.000764	ffar2	MORN4
4.19e-08	1.33715	0.25	0.008	0.000881	ffar2	CRISPLD1
5.24e-08	2.18064	0.75	0.068	0.001102	ffar2	MPZL1
5.33e-08	0.805701	0.25	0.008	0.001119	ffar2	NOTCH2NLA
5.39e-08	0.79432	0.25	0.008	0.001133	ffar2	RBM15B
8.22e-08	1.66002	0.25	0.008	0.001727	ffar2	TFCP2L1
9.05e-08	1.64757	0.25	0.008	0.001902	ffar2	LNP1
1.1e-07	0.797201	0.25	0.008	0.002304	ffar2	TDRP
1.28e-07	1.76737	0.5	0.032	0.002684	ffar2	HMGCL
1.44e-07	1.5578	0.25	0.008	0.003023	ffar2	SORD
1.66e-07	1.80867	0.25	0.008	0.003493	ffar2	SCD
1.71e-07	0.793438	0.25	0.008	0.003601	ffar2	PRC1-AS1
1.73e-07	0.788941	0.25	0.008	0.003644	ffar2	SLC25A1
1.73e-07	0.778367	0.25	0.008	0.003644	ffar2	SCUBE3
2.04e-07	1.30586	0.25	0.008	0.004294	ffar2	MYH13
2.24e-07	0.781639	0.25	0.008	0.004705	ffar2	TWIST1
2.36e-07	1.58566	0.25	0.009	0.004964	ffar2	RGMB
2.96e-07	1.70909	0.5	0.034	0.006222	ffar2	ELP6
3.13e-07	1.66762	0.25	0.009	0.006577	ffar2	C4orf19
3.34e-07	1.64602	0.25	0.009	0.007027	ffar2	CRAT
3.9e-07	1.3133	0.25	0.009	0.008194	ffar2	HEATR5A-DT
4.4e-07	0.785388	0.25	0.009	0.00924	ffar2	CRMP1
4.42e-07	1.65294	0.25	0.009	0.009288	ffar2	SEPHS2
4.73e-07	2.12019	0.5	0.036	0.009946	ffar2	PSMB3
4.75e-07	0.77914	0.25	0.009	0.009971	ffar2	GSDME
4.98e-07	1.32044	0.25	0.009	0.010455	ffar2	TACO1
5.55e-07	1.70905	0.5	0.035	0.011666	ffar2	SKIC8
5.61e-07	2.01806	0.75	0.078	0.011788	ffar2	ACADM
6.03e-07	0.771418	0.25	0.009	0.012676	ffar2	RHPN2
6.3e-07	1.99406	0.75	0.078	0.013228	ffar2	EXOC7
6.43e-07	0.771624	0.25	0.009	0.013513	ffar2	CD101
6.53e-07	2.13395	0.75	0.081	0.013719	ffar2	RPL10A
8.11e-07	1.56521	0.25	0.009	0.017048	ffar2	EGR2
8.2e-07	1.56911	0.25	0.009	0.017225	ffar2	TRIM47
8.9e-07	1.31506	0.25	0.009	0.018707	ffar2	PFAS
1.05e-06	1.64197	0.25	0.01	0.022007	ffar2	NCBP2AS2
1.12e-06	0.77605	0.25	0.009	0.023441	ffar2	PREB
1.14e-06	0.771603	0.25	0.009	0.023925	ffar2	ZNF610
1.3e-06	1.64868	0.25	0.01	0.027303	ffar2	IPO13
1.43e-06	2.03954	0.75	0.084	0.030016	ffar2	RACK1
1.43e-06	0.766927	0.25	0.01	0.030074	ffar2	TSPAN13
1.45e-06	1.62364	0.25	0.01	0.030455	ffar2	ECSCR
1.68e-06	1.79764	0.25	0.01	0.035279	ffar2	CDC42EP5
1.75e-06	0.776473	0.25	0.01	0.036742	ffar2	FHL3
1.78e-06	1.6302	0.25	0.01	0.037404	ffar2	CLEC1A
1.8e-06	0.773177	0.25	0.01	0.037842	ffar2	ELOVL2
1.86e-06	2.23811	0.75	0.091	0.039014	ffar2	SH2D3C
1.95e-06	0.767639	0.25	0.01	0.040933	ffar2	SYCE2
2.05e-06	1.80389	0.25	0.01	0.04304	ffar2	GNRH1
2.43e-06	1.29403	0.25	0.01	0.051125	ffar2	LOC124903183
2.6e-06	2.44707	0.75	0.091	0.054552	ffar2	KLHL5
2.8e-06	1.56002	0.25	0.01	0.058914	ffar2	ATG101
2.97e-06	0.778718	0.25	0.01	0.062402	ffar2	TSTD1
3.14e-06	0.746618	0.25	0.01	0.06604	ffar2	ADM
3.46e-06	1.57082	0.25	0.011	0.072708	ffar2	ZNF681
3.56e-06	1.77597	0.25	0.011	0.074747	ffar2	CD81-AS1
3.59e-06	1.76402	0.25	0.011	0.075439	ffar2	SCN1A-AS1
3.68e-06	0.783956	0.25	0.01	0.077235	ffar2	YOD1
3.76e-06	1.82853	0.5	0.041	0.078965	ffar2	GPR135
3.78e-06	0.756578	0.25	0.01	0.079415	ffar2	BOLA3
3.96e-06	0.725154	0.25	0.01	0.083181	ffar2	LINC03036
4.68e-06	0.769036	0.25	0.011	0.098392	ffar2	ZNF287
4.73e-06	0.767551	0.25	0.011	0.099292	ffar2	DVL2
4.81e-06	0.759142	0.25	0.011	0.101116	ffar2	NEXN-AS1
5.11e-06	1.78109	0.25	0.011	0.1074	ffar2	PMM1
6.01e-06	1.80915	0.5	0.042	0.126372	ffar2	NT5C
6.05e-06	1.29137	0.25	0.011	0.12715	ffar2	KLHL4
6.29e-06	1.6347	0.25	0.011	0.13211	ffar2	PROCA1
6.51e-06	1.62481	0.25	0.011	0.136819	ffar2	SLC39A13
6.63e-06	1.5546	0.25	0.011	0.139233	ffar2	RPP21
6.86e-06	1.53936	0.25	0.011	0.144185	ffar2	TMEM170B
6.98e-06	1.53169	0.25	0.011	0.146723	ffar2	ROR1-AS1
7.22e-06	0.762574	0.25	0.011	0.151676	ffar2	TMEM265
7.28e-06	0.753157	0.25	0.011	0.153014	ffar2	LINC00607
7.61e-06	0.756447	0.25	0.011	0.159876	ffar2	ILVBL
7.91e-06	1.66152	0.5	0.043	0.166247	ffar2	PGLS-DT
8.53e-06	0.753491	0.25	0.011	0.179162	ffar2	SPDL1
8.86e-06	1.77346	0.25	0.012	0.186161	ffar2	ANKRD2
9.09e-06	1.77325	0.25	0.012	0.19096	ffar2	SULT1A3
9.48e-06	1.62478	0.25	0.012	0.199221	ffar2	SMCR5
9.56e-06	1.6171	0.25	0.012	0.200914	ffar2	ITGB3
9.97e-06	1.54137	0.25	0.012	0.209586	ffar2	S100A16
1.07e-05	2.1659	0.75	0.107	0.225176	ffar2	RPL37
1.07e-05	0.755082	0.25	0.011	0.225264	ffar2	ZNF526
1.15e-05	1.61411	0.25	0.012	0.242232	ffar2	APEH
1.21e-05	2.28121	0.25	0.012	0.254586	ffar2	MRPS24
1.26e-05	1.63153	0.25	0.012	0.265277	ffar2	MRPL43
1.28e-05	0.754872	0.25	0.012	0.269617	ffar2	SOD3
1.3e-05	1.76922	0.25	0.012	0.274137	ffar2	TRAPPC1
1.4e-05	1.60302	0.25	0.012	0.295116	ffar2	RNF32-DT
1.65e-05	1.54405	0.25	0.012	0.346016	ffar2	TMEM69
1.67e-05	1.54142	0.25	0.012	0.351633	ffar2	NOMO2
1.68e-05	1.59358	0.5	0.045	0.352215	ffar2	MOB3B
1.69e-05	1.541	0.25	0.012	0.354475	ffar2	COPZ2
1.74e-05	2.09616	0.5	0.048	0.366225	ffar2	SHROOM4
1.76e-05	1.50356	0.25	0.012	0.369012	ffar2	TMEM266
1.77e-05	1.77682	0.5	0.046	0.372539	ffar2	SEPHS1
1.82e-05	1.62881	0.25	0.012	0.383407	ffar2	CPVL-AS2
1.85e-05	1.6103	0.25	0.012	0.388008	ffar2	APOL1
1.94e-05	1.5412	0.25	0.012	0.406942	ffar2	HOXB3
2.16e-05	2.02725	0.5	0.05	0.454714	ffar2	ACTR3B
2.2e-05	1.60811	0.25	0.013	0.461602	ffar2	MFSD13A
2.2e-05	1.60728	0.25	0.013	0.461602	ffar2	PSTK
2.23e-05	0.740383	0.25	0.012	0.468896	ffar2	G6PD
2.31e-05	2.14218	0.5	0.051	0.486434	ffar2	RRAGB
2.45e-05	1.74507	0.5	0.048	0.515557	ffar2	AKAP17A
2.73e-05	1.64375	0.5	0.048	0.573893	ffar2	KLHL36
2.73e-05	1.77795	0.25	0.013	0.574067	ffar2	DHX58
2.75e-05	1.77041	0.25	0.013	0.578461	ffar2	FGL2
2.75e-05	1.77292	0.25	0.013	0.578461	ffar2	IMP3
2.82e-05	2.07391	0.75	0.114	0.592213	ffar2	CSRP3
3.23e-05	2.11287	0.5	0.052	0.679238	ffar2	HLA-DRB1
3.35e-05	1.56622	0.5	0.048	0.703621	ffar2	HERC6
3.54e-05	1.7468	0.25	0.013	0.743047	ffar2	ATL1
3.54e-05	1.56798	0.5	0.049	0.743145	ffar2	MTA1
3.56e-05	0.739919	0.25	0.013	0.747372	ffar2	MARCHF11-AS1
3.62e-05	1.52985	0.25	0.013	0.759886	ffar2	CP
3.67e-05	1.77819	0.25	0.013	0.770622	ffar2	MIR17HG
3.73e-05	2.23308	0.75	0.112	0.78276	ffar2	RETREG3
3.81e-05	1.76149	0.25	0.013	0.79967	ffar2	RBMX2
3.89e-05	1.76076	0.25	0.013	0.817594	ffar2	THSD1
4.05e-05	0.740867	0.25	0.013	0.850184	ffar2	IMPACT
4.2e-05	0.737619	0.25	0.013	0.882542	ffar2	LOC101929270
4.47e-05	1.27072	0.25	0.013	0.940279	ffar2	KCNC1
4.49e-05	1.57746	0.25	0.013	0.943732	ffar2	RHPN1
4.73e-05	1.29228	0.25	0.014	0.993382	ffar2	ZNF134
4.73e-05	1.75331	0.75	0.109	0.993736	ffar2	ARHGAP29
4.94e-05	0.725969	0.25	0.013	1	ffar2	CAVIN3
5.07e-05	1.73156	0.5	0.051	1	ffar2	ABCC10
5.19e-05	1.57587	0.5	0.051	1	ffar2	TMEM242
5.33e-05	0.746278	0.25	0.013	1	ffar2	EDDM13
5.4e-05	2.14768	0.75	0.126	1	ffar2	DCLK1
5.59e-05	1.75569	0.25	0.014	1	ffar2	PYCR2
6.05e-05	1.26532	0.25	0.014	1	ffar2	DIO2
6.13e-05	1.52549	0.25	0.014	1	ffar2	RCCD1
6.28e-05	1.93873	0.75	0.121	1	ffar2	FAR2
6.4e-05	0.731924	0.25	0.014	1	ffar2	ZSCAN2
7.04e-05	1.69181	0.5	0.053	1	ffar2	ARHGAP22
7.22e-05	0.728875	0.25	0.014	1	ffar2	ZNF880
7.32e-05	0.733153	0.25	0.014	1	ffar2	CDCA7L
7.33e-05	1.75669	0.25	0.014	1	ffar2	ANGPTL2
7.37e-05	2.1262	0.5	0.057	1	ffar2	ITPRID2
8.06e-05	0.733368	0.25	0.014	1	ffar2	NBPF3
8.37e-05	1.611	0.25	0.015	1	ffar2	TWF2
8.47e-05	1.27051	0.25	0.014	1	ffar2	LRRCC1
8.97e-05	1.57537	0.5	0.054	1	ffar2	CASS4
9.49e-05	0.713117	0.25	0.014	1	ffar2	CCL21
9.52e-05	1.96755	0.5	0.058	1	ffar2	PLEKHB2
9.79e-05	1.53125	0.25	0.015	1	ffar2	PARP2
0.0001	2.10747	0.5	0.059	1	ffar2	UCHL5
0.000105	1.70394	0.5	0.055	1	ffar2	HPS1
0.000105	0.709648	0.25	0.014	1	ffar2	MEOX1
0.000105	1.52109	0.25	0.015	1	ffar2	TNFSF14
0.000106	0.738321	0.25	0.014	1	ffar2	YIPF2
0.000107	0.725463	0.25	0.014	1	ffar2	MFF-DT
0.00011	1.52358	0.25	0.015	1	ffar2	ZMAT5
0.000111	1.79612	0.75	0.122	1	ffar2	ARPC3
0.000125	1.51252	0.25	0.015	1	ffar2	NELFE
0.000133	0.723768	0.25	0.015	1	ffar2	POLR2G
0.000135	0.722014	0.25	0.015	1	ffar2	NUF2
0.000141	1.57123	0.25	0.015	1	ffar2	IER5L
0.000144	1.64821	0.5	0.056	1	ffar2	SPAG16
0.000148	0.701659	0.25	0.015	1	ffar2	TP63
0.000152	2.00517	0.5	0.06	1	ffar2	TMOD1
0.000152	0.720342	0.25	0.015	1	ffar2	HEBP1
0.000155	1.93722	0.5	0.061	1	ffar2	ZNF253
0.000163	1.47722	0.25	0.016	1	ffar2	FPR3
0.000166	1.58961	0.25	0.016	1	ffar2	AGPAT2
0.000168	0.712972	0.25	0.015	1	ffar2	COA8
0.00017	0.705014	0.25	0.015	1	ffar2	NKIRAS1
0.000172	1.77479	0.75	0.128	1	ffar2	CD2AP
0.000179	1.59477	0.25	0.016	1	ffar2	PEF1
0.000181	1.47374	0.25	0.016	1	ffar2	GRIK1
0.000184	1.23898	0.25	0.016	1	ffar2	FAM43A
0.000186	0.72407	0.25	0.015	1	ffar2	ZNF749
0.000186	1.69909	0.75	0.127	1	ffar2	KLHL20
0.00019	1.50642	0.25	0.016	1	ffar2	C14orf119
0.000191	1.72954	0.25	0.016	1	ffar2	CARD19
0.000192	1.51305	0.25	0.016	1	ffar2	RPL22L1
0.000192	1.50922	0.25	0.016	1	ffar2	MRPL35
0.000209	1.7413	0.5	0.061	1	ffar2	ZNF420
0.000209	1.57548	0.25	0.016	1	ffar2	DBNDD2
0.000212	1.49984	0.25	0.016	1	ffar2	TOMM6
0.000214	1.73916	0.25	0.016	1	ffar2	STK11IP
0.000226	1.50896	0.25	0.016	1	ffar2	PDCL
0.000227	0.710425	0.25	0.016	1	ffar2	ENPP1
0.00023	0.717066	0.25	0.016	1	ffar2	KCTD21
0.000233	0.658497	0.25	0.016	1	ffar2	LINC00511
0.000233	1.74653	0.25	0.017	1	ffar2	PTCD2
0.000251	1.49905	0.5	0.059	1	ffar2	TET1
0.000252	1.50403	0.25	0.017	1	ffar2	HNRNPH2
0.000258	2.89011	0.5	0.069	1	ffar2	ESR1
0.000259	1.72349	0.25	0.017	1	ffar2	LOC101927825
0.00027	1.44161	0.5	0.06	1	ffar2	MBD3
0.000278	1.56183	0.25	0.017	1	ffar2	VSIG4
0.000279	1.76425	0.75	0.136	1	ffar2	OCIAD1
0.000279	1.72821	0.25	0.017	1	ffar2	LSM2
0.000283	0.715547	0.25	0.016	1	ffar2	PIGP
0.000286	1.48321	0.5	0.06	1	ffar2	FAM241A
0.000286	1.49466	0.25	0.017	1	ffar2	ZNF30
0.000307	1.72802	0.25	0.017	1	ffar2	ZNF622
0.000307	1.49542	0.25	0.017	1	ffar2	TOMM5
0.000333	0.715111	0.25	0.017	1	ffar2	XYLB
0.000339	0.720167	0.25	0.017	1	ffar2	VAMP1
0.000344	1.51859	0.25	0.017	1	ffar2	RBMXL1
0.000377	0.697043	0.25	0.017	1	ffar2	ZSCAN9
0.000395	1.5597	0.25	0.018	1	ffar2	PPIC
0.000413	0.685644	0.25	0.017	1	ffar2	CXXC5
0.000423	1.44598	0.5	0.063	1	ffar2	LAMP2
0.000427	1.58668	0.25	0.018	1	ffar2	PPM1M
0.000457	1.55709	0.25	0.018	1	ffar2	ERBB2
0.000468	0.7158	0.25	0.017	1	ffar2	POLR3H
0.000486	1.88732	0.5	0.069	1	ffar2	TOGARAM2
0.000488	1.48687	0.25	0.018	1	ffar2	PHB1
0.000512	1.8274	0.5	0.069	1	ffar2	KMT2B
0.000515	0.704727	0.25	0.018	1	ffar2	BTBD19
0.000515	1.50364	0.25	0.018	1	ffar2	BCL10
0.000518	1.44218	0.5	0.064	1	ffar2	MGST1
0.000524	1.70296	0.25	0.018	1	ffar2	MOXD1
0.000544	1.70845	0.25	0.019	1	ffar2	IL7
0.000558	1.49464	0.25	0.019	1	ffar2	ZNF213
0.000574	1.48353	0.5	0.066	1	ffar2	ZNF335
0.000585	0.701164	0.25	0.018	1	ffar2	ATMIN
0.000587	1.23764	0.25	0.018	1	ffar2	TCTN1
0.000588	0.709224	0.25	0.018	1	ffar2	ZNF182
0.000603	1.73218	0.75	0.154	1	ffar2	DOCK1
0.000621	1.55946	0.25	0.019	1	ffar2	ITGB8
0.000632	1.49761	0.25	0.019	1	ffar2	CERS2
0.000644	1.47217	0.25	0.019	1	ffar2	YJEFN3
0.000663	1.48577	0.25	0.019	1	ffar2	TSR1
0.000666	0.689691	0.25	0.018	1	ffar2	SLC15A2
0.000669	0.693439	0.25	0.018	1	ffar2	ZNF674
0.000669	0.690527	0.25	0.018	1	ffar2	UTP25
0.000691	1.39067	0.5	0.067	1	ffar2	SLC27A1
0.000724	1.50499	0.25	0.019	1	ffar2	ZNF649
0.000731	0.684293	0.25	0.018	1	ffar2	CDC26
0.000739	1.56447	0.25	0.019	1	ffar2	CHRNE
0.000742	1.58137	0.5	0.069	1	ffar2	MED1
0.000774	1.47262	0.25	0.019	1	ffar2	FCGR3A
0.000786	1.51835	0.25	0.019	1	ffar2	ATP6V1F
0.000791	1.71139	0.25	0.02	1	ffar2	PMVK
0.000797	1.57835	0.75	0.147	1	ffar2	MYPN
0.000828	1.54986	0.25	0.02	1	ffar2	SERPINA3
0.00083	1.45629	0.25	0.019	1	ffar2	VAMP5
0.000832	1.56584	0.25	0.02	1	ffar2	ZBTB5
0.000834	0.690253	0.25	0.019	1	ffar2	THBS4-AS1
0.000843	1.56906	0.25	0.02	1	ffar2	CACNB1
0.000857	1.1711	0.25	0.019	1	ffar2	DGKB
0.000879	0.692821	0.25	0.019	1	ffar2	ZNF561-AS1
0.000889	1.47313	0.25	0.02	1	ffar2	SS18L2
0.000902	1.89442	0.75	0.159	1	ffar2	MYL6
0.000915	1.47645	0.5	0.07	1	ffar2	TRIM23
0.000953	1.53972	0.25	0.02	1	ffar2	CITED2
0.000959	1.88139	0.5	0.077	1	ffar2	RPL24
0.00097	0.696409	0.25	0.019	1	ffar2	AKR1C1
0.000986	1.55962	0.25	0.02	1	ffar2	LARP6
0.000994	1.70202	0.25	0.02	1	ffar2	SNX17
0.000995	1.37982	0.5	0.07	1	ffar2	PHF2
0.00101	1.42024	0.5	0.071	1	ffar2	FARSB
0.001046	0.688458	0.25	0.019	1	ffar2	MRPL58
0.001052	0.705174	0.25	0.019	1	ffar2	MRPS30
0.001052	1.50509	0.25	0.02	1	ffar2	PPP1R16A
0.00106	1.53292	0.25	0.02	1	ffar2	TMEM268
0.001094	0.6854	0.25	0.02	1	ffar2	DZIP1
0.001133	0.664519	0.25	0.02	1	ffar2	ZNF713
0.001238	1.57834	0.5	0.074	1	ffar2	TFB1M
0.001258	1.53272	0.25	0.021	1	ffar2	TMEM223
0.001275	1.43788	0.25	0.021	1	ffar2	CMTM4
0.001282	1.54842	0.25	0.021	1	ffar2	ANKS6
0.001284	0.670891	0.25	0.02	1	ffar2	TTLL4
0.001303	0.674675	0.25	0.02	1	ffar2	EXTL2
0.001357	0.676576	0.25	0.02	1	ffar2	FAM3A
0.001379	1.39353	0.5	0.074	1	ffar2	TRMT10B
0.001428	1.36451	0.5	0.074	1	ffar2	RPL23
0.001462	0.688256	0.25	0.02	1	ffar2	CHST9
0.001462	0.690171	0.25	0.02	1	ffar2	KIAA1586
0.001469	1.46337	0.75	0.159	1	ffar2	YEATS2
0.001492	1.36543	0.5	0.075	1	ffar2	RNF121
0.001493	1.67167	0.25	0.022	1	ffar2	P3H4
0.001513	0.667375	0.25	0.021	1	ffar2	LINC00632
0.001521	1.54181	0.25	0.022	1	ffar2	TIGD7
0.001522	1.20243	0.25	0.021	1	ffar2	C3orf62
0.001587	0.683006	0.25	0.021	1	ffar2	NUFIP1
0.001589	2.29318	0.25	0.022	1	ffar2	OCRL
0.001654	1.39333	0.5	0.076	1	ffar2	NEK10
0.001664	0.678152	0.25	0.021	1	ffar2	RGP1
0.001672	0.661689	0.25	0.021	1	ffar2	CHRDL2
0.001681	1.53647	0.25	0.022	1	ffar2	CYB5A
0.001744	0.694018	0.25	0.021	1	ffar2	FXYD6
0.001752	1.51821	0.25	0.022	1	ffar2	BEND7
0.001806	1.52777	0.25	0.022	1	ffar2	SMAD6
0.001811	1.9512	1	0.385	1	ffar2	FN1
0.001832	2.13486	0.5	0.084	1	ffar2	FLNC
0.001843	0.661624	0.25	0.021	1	ffar2	PTPRN2
0.001869	0.662571	0.25	0.021	1	ffar2	NDUFAF1
0.001887	0.617497	0.25	0.021	1	ffar2	KIRREL3
0.001889	2.46546	0.5	0.08	1	ffar2	ABHD12
0.001914	1.14927	0.25	0.022	1	ffar2	RYR3
0.00194	1.37654	0.5	0.077	1	ffar2	MFAP5
0.001982	0.649138	0.25	0.021	1	ffar2	PDK1-AS1
0.001989	1.4042	0.5	0.078	1	ffar2	DCP1B
0.002006	1.6672	0.25	0.023	1	ffar2	MED16
0.002009	1.82604	0.5	0.086	1	ffar2	CEP164
0.002039	1.30099	0.5	0.077	1	ffar2	COL18A1
0.002055	1.83049	0.5	0.086	1	ffar2	ALPK2
0.002062	0.677605	0.25	0.022	1	ffar2	RNASEH2C
0.002066	1.44194	0.25	0.023	1	ffar2	C4orf3
0.002072	0.65949	0.25	0.022	1	ffar2	ADGRL1-AS1
0.002097	1.45085	0.25	0.023	1	ffar2	TXN2
0.002103	1.42856	0.25	0.023	1	ffar2	TOR1B
0.002119	0.67975	0.25	0.022	1	ffar2	GBP4
0.002122	1.53189	0.75	0.181	1	ffar2	TEAD1
0.002153	1.92321	0.75	0.217	1	ffar2	MAP3K20
0.002173	1.42977	0.25	0.023	1	ffar2	MPC2
0.002234	2.19279	0.5	0.082	1	ffar2	SERINC3
0.002243	0.678464	0.25	0.022	1	ffar2	MYNN
0.002253	0.64995	0.25	0.022	1	ffar2	PKD2L2
0.0023	1.50423	0.5	0.08	1	ffar2	SEC23IP
0.002325	0.645371	0.25	0.022	1	ffar2	CD14
0.002336	1.67625	0.25	0.023	1	ffar2	DARS2
0.002345	1.43902	0.25	0.023	1	ffar2	CYP2U1-AS1
0.002355	1.52193	0.25	0.023	1	ffar2	MRPL32
0.002392	0.651971	0.25	0.022	1	ffar2	TEX264
0.002436	1.4016	0.5	0.08	1	ffar2	SLCO2B1
0.00245	0.667034	0.25	0.022	1	ffar2	GALNT16
0.002495	1.30238	0.5	0.079	1	ffar2	PDIA6
0.002509	1.42385	0.5	0.081	1	ffar2	VEGFA
0.002527	0.660202	0.25	0.022	1	ffar2	DNTTIP1
0.002544	2.34121	0.5	0.084	1	ffar2	CRCP
0.002546	1.46414	0.75	0.173	1	ffar2	DIP2C
0.002622	1.66367	0.25	0.024	1	ffar2	RPS19BP1
0.002643	1.66369	0.25	0.024	1	ffar2	CTDNEP1
0.002656	0.667086	0.25	0.023	1	ffar2	ARHGEF40
0.002669	1.42097	0.25	0.024	1	ffar2	ZNF283
0.002669	1.54158	0.25	0.024	1	ffar2	SEMA3A
0.002678	1.83674	0.5	0.091	1	ffar2	MPP3
0.002702	1.4508	0.25	0.024	1	ffar2	INSIG1
0.002769	1.45186	0.25	0.024	1	ffar2	TFAM
0.002792	1.44514	0.25	0.024	1	ffar2	SIAE
0.002808	1.25614	0.5	0.08	1	ffar2	IL1R1
0.002816	1.44894	0.25	0.024	1	ffar2	NBPF14
0.002816	1.52025	0.25	0.024	1	ffar2	COMMD6
0.002823	0.646062	0.25	0.023	1	ffar2	PCDH9-AS2
0.002848	0.641171	0.25	0.023	1	ffar2	TMEM161A
0.002849	1.52001	0.25	0.024	1	ffar2	CNOT3
0.00286	1.339	0.5	0.082	1	ffar2	NAPG
0.002867	1.52632	0.25	0.024	1	ffar2	RCAN3AS
0.002917	1.66368	0.25	0.024	1	ffar2	SOCS3
0.002935	0.625567	0.25	0.023	1	ffar2	ADAM32
0.002947	1.27922	0.5	0.081	1	ffar2	MB21D2
0.00296	1.70506	0.75	0.213	1	ffar2	PTBP3
0.002973	0.563869	0.25	0.023	1	ffar2	SORCS1
0.003007	1.72615	0.5	0.09	1	ffar2	SDK1
0.003076	0.649876	0.25	0.023	1	ffar2	GSK3A
0.003089	0.629927	0.25	0.023	1	ffar2	USB1
0.003154	0.653694	0.25	0.023	1	ffar2	CHRM3-AS2
0.003173	1.51879	0.5	0.086	1	ffar2	EIF2S3
0.003175	1.19979	0.25	0.024	1	ffar2	KIAA1755
0.003183	1.42814	0.25	0.024	1	ffar2	WDR83OS
0.003223	1.48728	0.25	0.024	1	ffar2	ATP6V0B
0.003248	2.26699	0.25	0.025	1	ffar2	HDHD3
0.003315	1.35489	0.5	0.084	1	ffar2	DDI2
0.003378	1.451	0.25	0.025	1	ffar2	ZNF317
0.003388	2.44064	0.25	0.025	1	ffar2	TMEM258
0.0034	1.25808	0.5	0.083	1	ffar2	AVEN
0.003419	1.51383	0.25	0.025	1	ffar2	SIVA1
0.003433	1.51871	0.25	0.025	1	ffar2	RIOK2
0.003491	1.42619	0.25	0.025	1	ffar2	ADIRF
0.00351	1.67055	0.5	0.093	1	ffar2	ZYG11B
0.00351	1.4416	0.25	0.025	1	ffar2	OTUD3
0.003539	1.72094	0.5	0.096	1	ffar2	LY75
0.003546	1.4385	0.25	0.025	1	ffar2	PHLDB3
0.003594	1.54219	0.75	0.204	1	ffar2	PHLDB2
0.003599	0.640138	0.25	0.024	1	ffar2	CSKMT
0.003683	0.628093	0.25	0.024	1	ffar2	ZNF844
0.003685	1.46266	0.75	0.195	1	ffar2	AGPAT3
0.003809	1.65023	0.25	0.025	1	ffar2	MSANTD3
0.00383	0.637804	0.25	0.024	1	ffar2	MEDAG
0.00383	0.66328	0.25	0.024	1	ffar2	WRAP73
0.003849	1.27979	0.5	0.085	1	ffar2	ZCCHC14
0.003863	1.45876	0.5	0.088	1	ffar2	MIRLET7BHG
0.003871	1.68538	0.5	0.096	1	ffar2	PRR12
0.003948	0.660387	0.25	0.024	1	ffar2	DHRS4L2
0.003971	1.41418	0.5	0.087	1	ffar2	ABLIM3
0.003987	1.54487	0.75	0.214	1	ffar2	SECISBP2
0.004013	1.71767	0.5	0.096	1	ffar2	SDC2
0.004013	0.671641	0.25	0.024	1	ffar2	MUSK
0.00406	1.44671	0.25	0.026	1	ffar2	PSMB10
0.004063	0.637558	0.25	0.024	1	ffar2	AVIL
0.004063	0.620338	0.25	0.024	1	ffar2	BMPER
0.004126	1.34638	0.5	0.087	1	ffar2	PPP6R1
0.004223	1.63461	0.25	0.026	1	ffar2	SEC61A2
0.004232	1.64447	0.5	0.095	1	ffar2	CKMT2
0.00427	0.628185	0.25	0.024	1	ffar2	SSPN
0.004273	1.42416	0.5	0.089	1	ffar2	TP53BP2
0.004323	1.64377	0.25	0.026	1	ffar2	TTLL1
0.004323	1.62805	0.25	0.026	1	ffar2	WNT2B
0.004352	1.74587	0.5	0.098	1	ffar2	PCMT1
0.004408	1.50553	0.25	0.026	1	ffar2	GIN1
0.004561	0.604501	0.25	0.025	1	ffar2	MICALL2
0.004615	0.620186	0.25	0.025	1	ffar2	KBTBD6-DT
0.004658	1.3412	0.5	0.089	1	ffar2	NUP205
0.004671	1.47633	0.25	0.026	1	ffar2	PNKD
0.004689	0.595286	0.25	0.025	1	ffar2	PSPH
0.004708	0.616304	0.25	0.025	1	ffar2	KDELR2
0.004741	1.60029	0.25	0.026	1	ffar2	AKR1B1
0.004836	1.45725	0.5	0.094	1	ffar2	RPS7
0.004848	1.61313	0.25	0.026	1	ffar2	LRRTM4
0.00486	0.620572	0.25	0.025	1	ffar2	DNAL1
0.004874	1.44042	0.75	0.202	1	ffar2	WWTR1
0.004976	0.639858	0.25	0.025	1	ffar2	CMAS
0.005006	1.36545	0.25	0.026	1	ffar2	KCNQ3
0.005069	1.52826	0.75	0.232	1	ffar2	MNAT1
0.005094	0.64169	0.25	0.025	1	ffar2	NBPF26
0.005101	1.62067	0.25	0.027	1	ffar2	SGTA
0.00511	1.24099	0.5	0.089	1	ffar2	RALGPS1
0.005127	1.52697	0.25	0.027	1	ffar2	PVR
0.005127	1.41728	0.25	0.027	1	ffar2	C2orf76
0.005274	0.608006	0.25	0.025	1	ffar2	PALD1
0.005291	1.17071	0.25	0.026	1	ffar2	OAF
0.005369	1.43167	0.75	0.207	1	ffar2	SLC16A1-AS1
0.005389	1.5028	0.25	0.027	1	ffar2	RUSF1
0.005389	1.4912	0.25	0.027	1	ffar2	KIAA1191
0.005392	2.22157	0.5	0.109	1	ffar2	ACBD3
0.005461	1.50226	0.25	0.027	1	ffar2	CNIH1
0.005491	1.4185	0.25	0.027	1	ffar2	ZNF441
0.005678	1.62144	0.25	0.027	1	ffar2	RAB11B
0.00571	1.48258	0.25	0.027	1	ffar2	HAS2
0.005752	1.26683	0.5	0.092	1	ffar2	CRLS1
0.005772	2.15785	0.5	0.103	1	ffar2	LYPLA1
0.005793	1.48128	0.25	0.028	1	ffar2	CD52
0.00582	0.631125	0.25	0.026	1	ffar2	SASS6
0.005948	0.650474	0.25	0.026	1	ffar2	VSTM4
0.005948	0.628512	0.25	0.026	1	ffar2	PRTFDC1
0.005957	1.47003	0.25	0.027	1	ffar2	AURKAIP1
0.005993	0.644042	0.25	0.026	1	ffar2	YIPF1
0.006015	0.617278	0.25	0.026	1	ffar2	EFCAB11
0.006036	1.60786	0.5	0.102	1	ffar2	RPS9
0.006144	1.94482	0.75	0.238	1	ffar2	FNIP2
0.006191	0.574348	0.25	0.026	1	ffar2	NGF
0.006214	0.612133	0.25	0.026	1	ffar2	LRRC57
0.006256	1.45759	0.25	0.028	1	ffar2	RBPMS2
0.006261	0.613167	0.25	0.026	1	ffar2	P3H1
0.006402	1.39917	0.25	0.028	1	ffar2	NPHP4
0.006447	2.14594	0.25	0.029	1	ffar2	SNHG16
0.006465	2.19666	0.5	0.114	1	ffar2	RALGDS
0.006518	1.96454	0.75	0.253	1	ffar2	PTK2B
0.006566	1.22181	0.5	0.093	1	ffar2	ARL6IP5
0.006578	1.60696	0.25	0.028	1	ffar2	LZTFL1
0.006613	1.22103	0.5	0.093	1	ffar2	NNMT
0.006722	0.591177	0.25	0.026	1	ffar2	CBR3-AS1
0.006752	2.36265	0.5	0.109	1	ffar2	NPAS2
0.006822	0.621262	0.25	0.026	1	ffar2	SCML1
0.007057	1.1522	0.25	0.028	1	ffar2	GATB
0.00715	0.621477	0.25	0.027	1	ffar2	SLC16A12
0.007223	1.47012	0.25	0.029	1	ffar2	AGBL5
0.007276	1.62765	0.25	0.029	1	ffar2	CMTM1
0.007326	1.40497	0.25	0.029	1	ffar2	CHROMR
0.007405	1.22531	0.5	0.095	1	ffar2	FMNL3
0.007417	1.59356	0.25	0.029	1	ffar2	KCND2
0.007477	0.604531	0.25	0.027	1	ffar2	USP30
0.007482	1.38148	0.25	0.029	1	ffar2	RSPH3
0.007509	1.43619	0.25	0.029	1	ffar2	COQ5
0.007535	1.40695	0.25	0.029	1	ffar2	AZIN2
0.007538	0.619088	0.25	0.027	1	ffar2	GLI2
0.00754	1.21469	0.5	0.095	1	ffar2	TMEM41B
0.007586	1.36116	0.75	0.219	1	ffar2	APBB2
0.007615	1.45464	0.25	0.029	1	ffar2	CRELD2
0.00762	0.613672	0.25	0.027	1	ffar2	MTBP
0.007702	0.62564	0.25	0.027	1	ffar2	EDNRB
0.007722	1.43757	0.25	0.029	1	ffar2	PGD
0.007722	1.38955	0.25	0.029	1	ffar2	UQCC6
0.007814	0.629331	0.25	0.027	1	ffar2	BMI1
0.007825	1.48785	0.25	0.029	1	ffar2	ABHD13
0.007834	1.80055	0.5	0.101	1	ffar2	BMERB1
0.007855	1.4698	0.25	0.029	1	ffar2	MKRN2
0.008128	1.74253	0.5	0.114	1	ffar2	GNAI3
0.008168	2.07459	0.5	0.118	1	ffar2	TFG
0.008194	1.1381	0.25	0.029	1	ffar2	GML
0.008219	0.604377	0.25	0.027	1	ffar2	ACOT8
0.008458	0.599698	0.25	0.028	1	ffar2	MRPL38
0.008532	1.17028	1	0.463	1	ffar2	DDX5
0.008536	1.48783	0.25	0.03	1	ffar2	ANP32E
0.008559	1.72593	0.5	0.115	1	ffar2	PSIP1
0.008579	0.558902	0.25	0.028	1	ffar2	GDPD1
0.008661	1.09837	0.25	0.029	1	ffar2	AGMO
0.008885	0.632201	0.25	0.028	1	ffar2	FAM200B
0.008886	0.556399	0.25	0.028	1	ffar2	SLC27A4
0.00889	1.46151	0.25	0.03	1	ffar2	GNB2
0.00893	1.42277	0.25	0.03	1	ffar2	NHERF2
0.008948	0.605319	0.25	0.028	1	ffar2	AMMECR1L
0.008975	1.62057	0.25	0.03	1	ffar2	RGL2
0.009134	0.612571	0.25	0.028	1	ffar2	CFAP298
0.009137	0.597482	0.25	0.028	1	ffar2	BCAS2
0.009158	1.60246	0.5	0.112	1	ffar2	JAKMIP2
0.009466	1.38258	0.25	0.03	1	ffar2	SPTB
0.009497	1.43574	0.25	0.03	1	ffar2	CENPT
0.00955	1.61514	0.25	0.031	1	ffar2	MFSD10
0.009554	0.582187	0.25	0.028	1	ffar2	ANKRD9
0.009707	1.14314	0.5	0.098	1	ffar2	ST8SIA1
0.009725	1.61733	0.25	0.031	1	ffar2	PDLIM2
0.009727	1.59705	0.5	0.113	1	ffar2	WARS2-AS1
0.009782	0.580788	0.25	0.028	1	ffar2	GPATCH4
0.009807	1.78318	0.5	0.118	1	ffar2	PPP2R3A
0.009887	1.61028	0.25	0.031	1	ffar2	ZSCAN26
0.009903	1.37142	0.25	0.03	1	ffar2	CSNK2B

## Sheet: sma_ffar_deg_mye
p_val	avg_log2FC	pct.1	pct.2	p_val_adj	cluster	gene
2.72e-05	2.40301	0.495	0.121	0.57175	ctrl	KCNMA1
6.87e-05	1.90768	0.459	0.091	1	ctrl	ZBTB16
0.000561	1.05047	0.637	0.394	1	ctrl	MERTK
0.000815	1.1818	0.647	0.455	1	ctrl	STARD13
0.000837	1.12078	0.738	0.545	1	ctrl	CD163
0.001232	1.87727	0.46	0.212	1	ctrl	CPM
0.001738	1.46657	0.496	0.242	1	ctrl	PDK4
0.002365	1.03025	0.575	0.333	1	ctrl	FNBP1
0.002441	1.72521	0.461	0.212	1	ctrl	NHSL1
0.003471	1.4962	0.315	0.091	1	ctrl	PDE3B
0.003972	0.792429	0.667	0.455	1	ctrl	TNS3
0.005798	0.998241	0.539	0.333	1	ctrl	PRKAG2
0.006185	1.1444	0.434	0.242	1	ctrl	JAK1
0.006974	0.905238	0.522	0.273	1	ctrl	FCHO2
0.00742	1.00517	0.652	0.424	1	ctrl	MRC1
0.00772	0.894358	0.715	0.576	1	ctrl	FMN1
0.007838	0.793764	0.704	0.576	1	ctrl	CELF2
0.008098	1.33784	0.296	0.091	1	ctrl	TBC1D16
0.00831	1.18012	0.359	0.152	1	ctrl	RPS6KA2
0	2.79754	1	0	0	ffar2	FFAR2
3.17e-08	0.967598	0.818	0.388	0.000667	ffar2	AKAP6
8.75e-08	0.799183	0.273	0.056	0.001839	ffar2	WNK2
1.29e-07	1.22673	0.273	0.057	0.002703	ffar2	ITGAL
8.79e-07	1.12692	0.667	0.3	0.018479	ffar2	TBC1D1
1.33e-06	1.43796	0.455	0.161	0.028007	ffar2	CD55
2.37e-06	1.31278	0.515	0.199	0.049769	ffar2	CYBB
4.01e-06	0.880035	0.273	0.071	0.084275	ffar2	SERPINB9
4.91e-06	1.07869	0.485	0.176	0.103098	ffar2	TIMP1
6.19e-06	0.916025	0.364	0.115	0.130002	ffar2	SUPT20H
9.74e-06	0.969994	0.636	0.323	0.204688	ffar2	HCK
1.06e-05	1.1014	0.303	0.087	0.222912	ffar2	COX7C
1.15e-05	0.769557	0.364	0.116	0.240699	ffar2	LAP3
1.37e-05	0.78759	0.303	0.089	0.288631	ffar2	SEC23B
1.78e-05	0.879545	0.727	0.356	0.373215	ffar2	VCAN
1.94e-05	0.824769	0.485	0.197	0.407886	ffar2	YTHDC1
2.31e-05	0.948553	0.273	0.077	0.485615	ffar2	CYTOR
3.63e-05	0.779411	0.455	0.173	0.762593	ffar2	CST3
3.98e-05	0.765591	0.394	0.142	0.836397	ffar2	H3-3B
4.68e-05	0.848836	0.848	0.588	0.984157	ffar2	CYRIB
5.31e-05	0.675295	0.515	0.212	1	ffar2	SLC16A7
6.65e-05	0.963007	0.545	0.234	1	ffar2	ARAP2
8.5e-05	0.843356	0.303	0.099	1	ffar2	ITGA4
0.000115	0.991956	0.697	0.483	1	ffar2	PTPRC
0.000122	1.00426	0.848	0.561	1	ffar2	PTPRJ
0.000138	0.778323	0.394	0.157	1	ffar2	EEFSEC
0.000177	0.711563	0.273	0.088	1	ffar2	SAP30BP
0.000178	0.818814	0.758	0.485	1	ffar2	FHL2
0.000188	0.849324	0.909	0.709	1	ffar2	PDLIM5
0.000234	0.760813	0.273	0.09	1	ffar2	RPS27
0.00026	0.610934	0.576	0.278	1	ffar2	PTPN2
0.000264	0.672954	0.576	0.291	1	ffar2	MAP4K4
0.000272	1.03606	0.273	0.094	1	ffar2	RNLS
0.000279	0.741391	0.273	0.092	1	ffar2	MYO18A
0.000282	1.0954	0.273	0.091	1	ffar2	VASP
0.000284	0.641559	0.667	0.356	1	ffar2	CD44
0.000289	0.850952	0.364	0.15	1	ffar2	PARP9
0.000339	0.905568	0.333	0.127	1	ffar2	SETDB1
0.000501	0.75865	0.273	0.096	1	ffar2	RPL8
0.000645	0.960493	0.364	0.154	1	ffar2	PTP4A2
0.000664	0.744905	0.606	0.355	1	ffar2	ANK2
0.00067	0.675925	0.424	0.196	1	ffar2	PITPNA
0.000676	0.59749	0.848	0.638	1	ffar2	ASAP1
0.000747	0.658808	0.273	0.098	1	ffar2	CNOT6
0.000768	0.901851	0.576	0.366	1	ffar2	FBXW7
0.00077	0.785225	0.455	0.222	1	ffar2	AGO2
0.000777	0.640835	0.697	0.437	1	ffar2	PPP1R12B
0.000804	0.804393	0.697	0.426	1	ffar2	ATP8B4
0.00083	0.705888	0.576	0.3	1	ffar2	TANK
0.000862	0.734303	0.97	0.778	1	ffar2	SLC8A1
0.000981	0.809518	0.333	0.14	1	ffar2	PLN
0.000994	1.10271	0.333	0.143	1	ffar2	TMTC2
0.001021	0.797074	0.364	0.161	1	ffar2	HIF1A-AS3
0.001025	0.603022	0.273	0.099	1	ffar2	MYOCD
0.001047	0.562835	0.424	0.194	1	ffar2	LPGAT1
0.001212	0.908715	0.424	0.216	1	ffar2	ARSB
0.001265	1.17595	0.303	0.127	1	ffar2	NFKBIZ
0.001272	0.570049	0.545	0.289	1	ffar2	NRIP1
0.001338	0.662994	0.333	0.14	1	ffar2	PLEKHO1
0.001593	0.89143	0.273	0.109	1	ffar2	CAPN2
0.001759	0.568048	0.727	0.473	1	ffar2	NEBL
0.001763	0.467943	0.273	0.102	1	ffar2	TRIQK
0.001801	0.43997	0.848	0.588	1	ffar2	SORBS2
0.00191	0.580535	0.273	0.107	1	ffar2	ZSWIM7
0.00198	0.664475	0.606	0.358	1	ffar2	MYO9A
0.002036	0.95905	0.455	0.244	1	ffar2	SREBF2
0.002173	0.664446	0.273	0.105	1	ffar2	TMEM71
0.002305	0.735428	0.636	0.381	1	ffar2	RAP1B
0.002411	0.474583	0.606	0.346	1	ffar2	B2M
0.002646	0.676577	0.333	0.144	1	ffar2	LCLAT1
0.002674	0.698341	0.333	0.15	1	ffar2	SLC25A37
0.002789	0.799506	0.333	0.156	1	ffar2	CD47
0.002928	0.760323	0.545	0.316	1	ffar2	ROR1
0.002979	0.561377	0.424	0.208	1	ffar2	EEF1A1
0.00299	0.769316	0.273	0.117	1	ffar2	ZNF75D
0.003211	0.612169	0.394	0.193	1	ffar2	EYA3
0.00347	0.967485	0.545	0.336	1	ffar2	PRKCA
0.003873	0.501583	0.667	0.421	1	ffar2	BACH1
0.004183	0.798715	0.273	0.12	1	ffar2	ST3GAL2
0.004213	0.710915	0.333	0.155	1	ffar2	EIF1
0.004268	0.578944	0.545	0.311	1	ffar2	PSEN1
0.004292	0.486317	0.545	0.311	1	ffar2	C2CD5
0.004537	0.57006	0.273	0.115	1	ffar2	NLRC5
0.004619	0.764304	0.515	0.299	1	ffar2	FRY
0.004647	0.625009	0.424	0.223	1	ffar2	FOCAD
0.004675	0.607734	0.364	0.177	1	ffar2	NUDT4
0.004957	0.496054	0.273	0.115	1	ffar2	PDZD8
0.005147	0.792433	0.364	0.176	1	ffar2	LOC105373170
0.005185	0.614742	0.485	0.26	1	ffar2	BCL2
0.005541	0.543343	0.333	0.159	1	ffar2	RIOK3
0.005681	0.639789	0.667	0.506	1	ffar2	MEF2C
0.005989	0.629977	0.364	0.183	1	ffar2	UGP2
0.006131	0.716084	0.333	0.172	1	ffar2	LPIN2
0.006137	0.736349	0.485	0.308	1	ffar2	RICTOR
0.006184	0.866918	0.424	0.245	1	ffar2	MB
0.006426	0.327227	0.485	0.247	1	ffar2	MEIS2
0.006494	0.916896	0.606	0.432	1	ffar2	LYN
0.00666	0.570792	0.394	0.208	1	ffar2	MTR
0.006867	0.601501	0.364	0.177	1	ffar2	MYOM2
0.006878	0.536057	0.333	0.157	1	ffar2	BCL6
0.006946	0.88046	0.576	0.355	1	ffar2	FAM20A
0.007345	0.621619	0.364	0.191	1	ffar2	CRLF3
0.007401	0.663104	0.515	0.332	1	ffar2	TMEM131
0.007437	0.450544	0.394	0.199	1	ffar2	COX2
0.007464	0.500903	0.788	0.613	1	ffar2	CACNA1C
0.00758	0.420848	0.303	0.137	1	ffar2	TENT4A
0.008118	0.629006	0.394	0.21	1	ffar2	LRRC8D
0.008304	0.390798	0.515	0.284	1	ffar2	PARD3
0.008369	0.367607	0.727	0.467	1	ffar2	MLIP
0.00914	0.306767	0.303	0.135	1	ffar2	METRNL
0.009176	0.532756	0.303	0.142	1	ffar2	EYA4
0.009356	0.418682	0.636	0.378	1	ffar2	PDE4B
0.009362	0.45648	0.394	0.208	1	ffar2	ENTPD1-AS1
0.009537	0.594469	0.697	0.48	1	ffar2	FGF12
0.009598	0.447079	0.788	0.545	1	ffar2	CTNNA3
0.009637	0.522621	0.697	0.539	1	ffar2	DENND1A
0.009778	0.542678	0.333	0.17	1	ffar2	UNC13B
0.009854	0.701229	0.485	0.31	1	ffar2	RPS6KC1
0.00986	0.564119	0.455	0.259	1	ffar2	XRCC5
0.00987	0.575	0.333	0.169	1	ffar2	SLC8B1
0.009972	0.382012	0.273	0.119	1	ffar2	KSR1
